# Supplementary figures and images for: The sifting of visual information in the superior colliculus
Source: eLife journal article supplement (doi:10.7554/elife.50678), 2020-04-14

**A**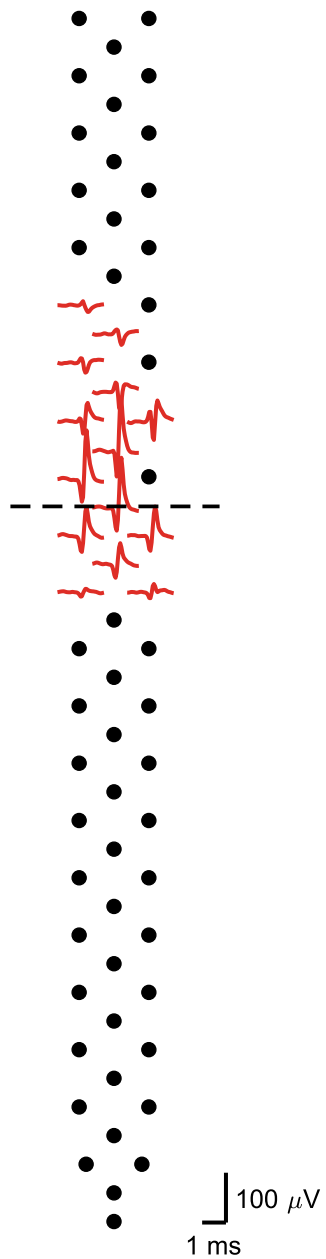**B**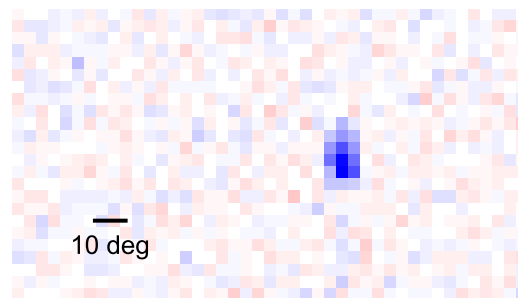**C**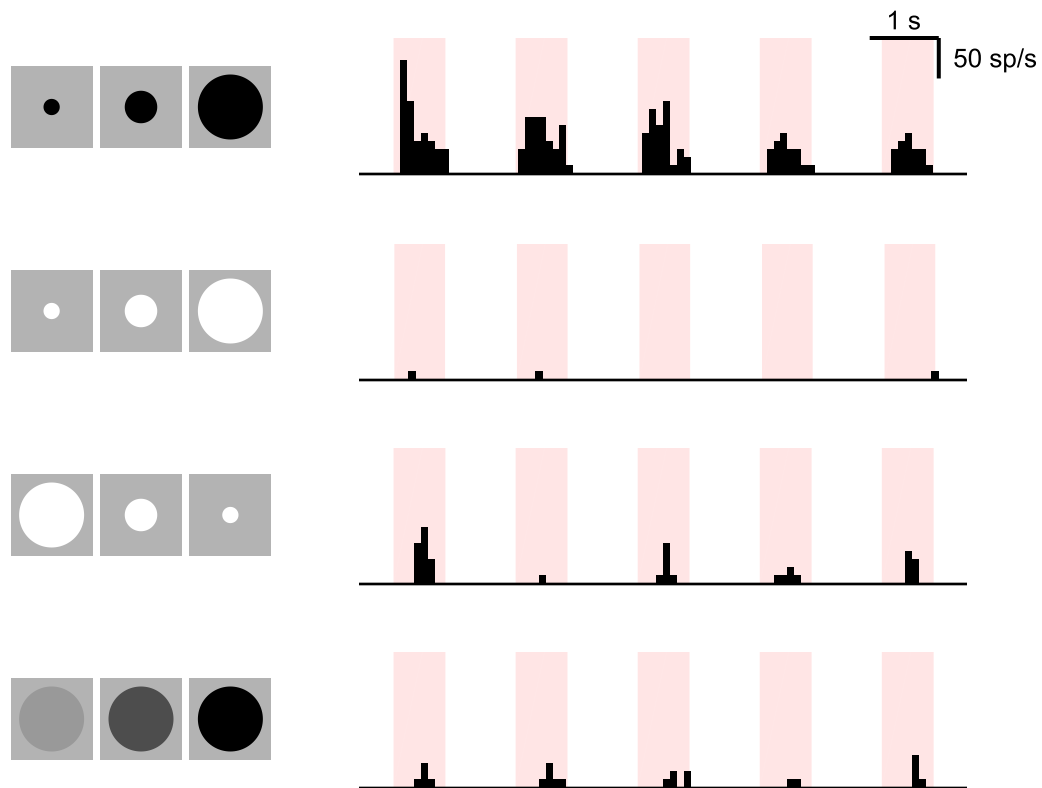

Supplement: supp [file elife-50678-supp-v1.zip]

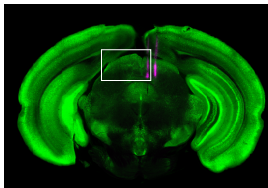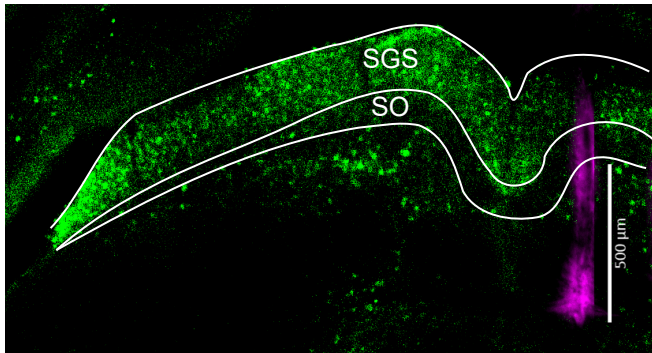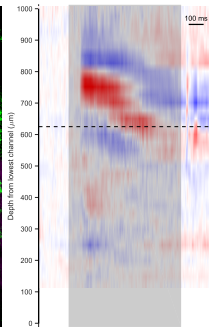

Supplement: supp [file elife-50678-supp-v1.zip]

**A**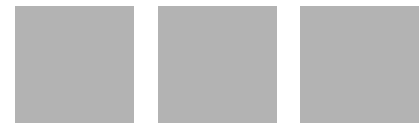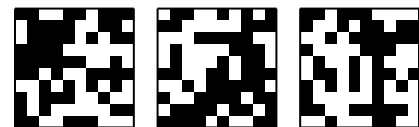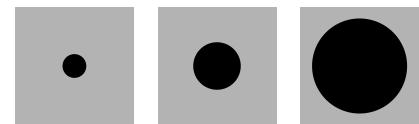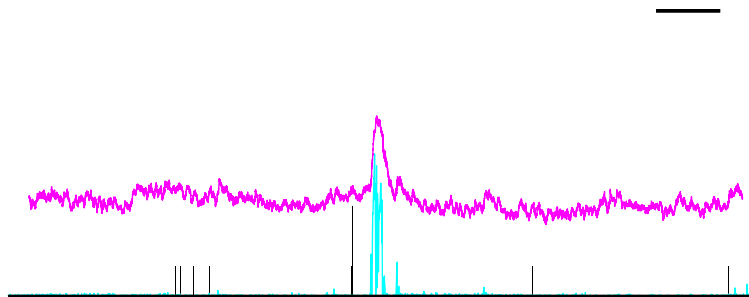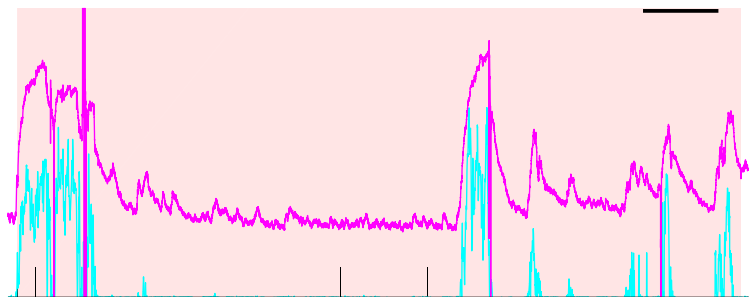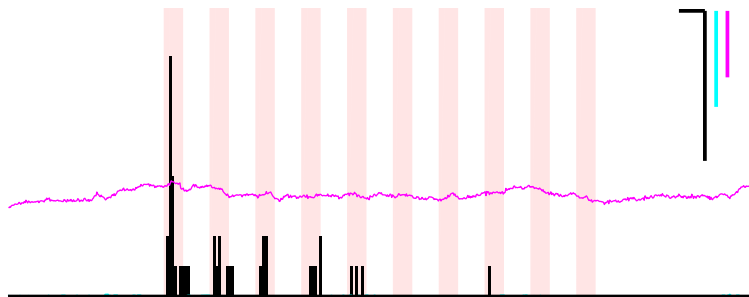**B**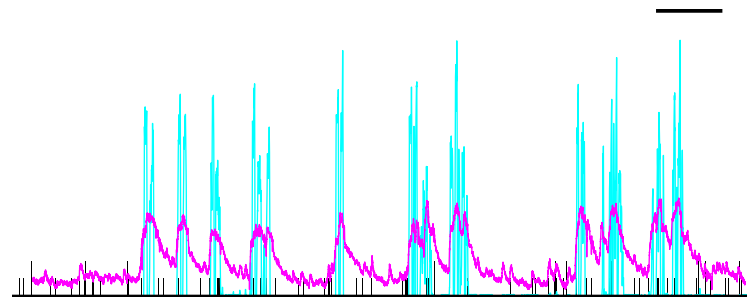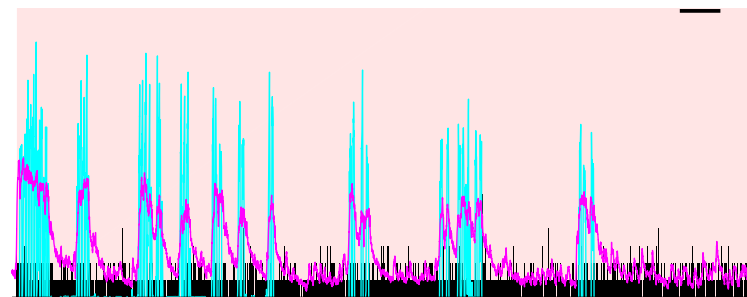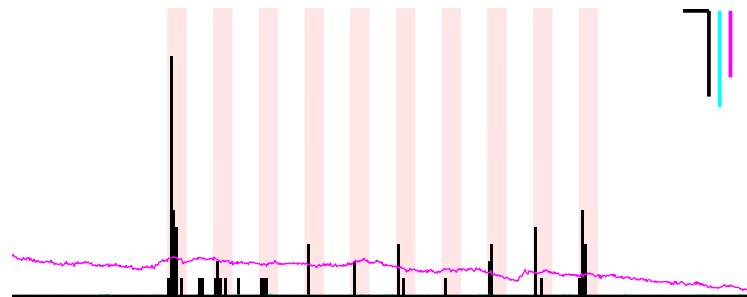**C**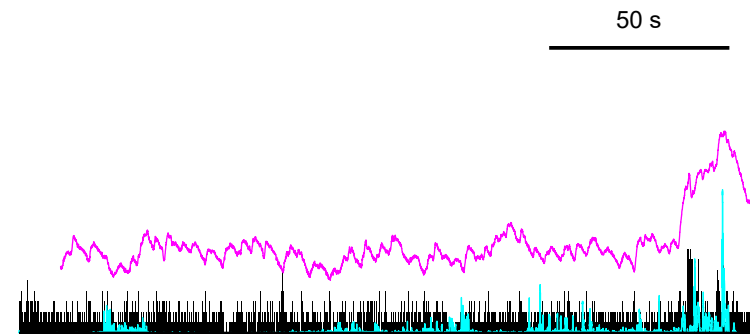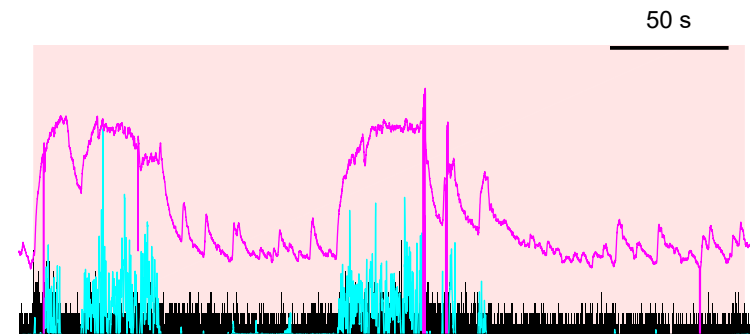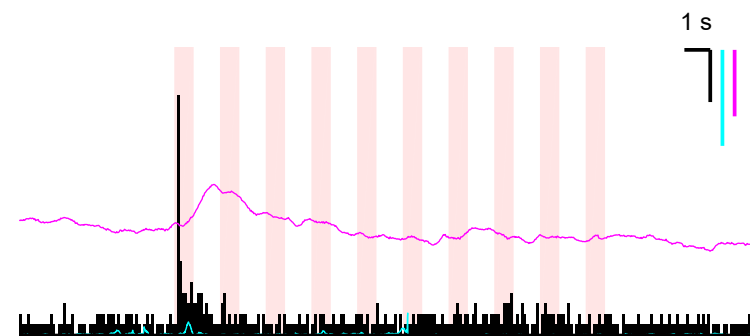

1 s  
50 sp/s  
10 cm/s  
0.5 mm

Supplement: supp [file elife-50678-supp-v1.zip]

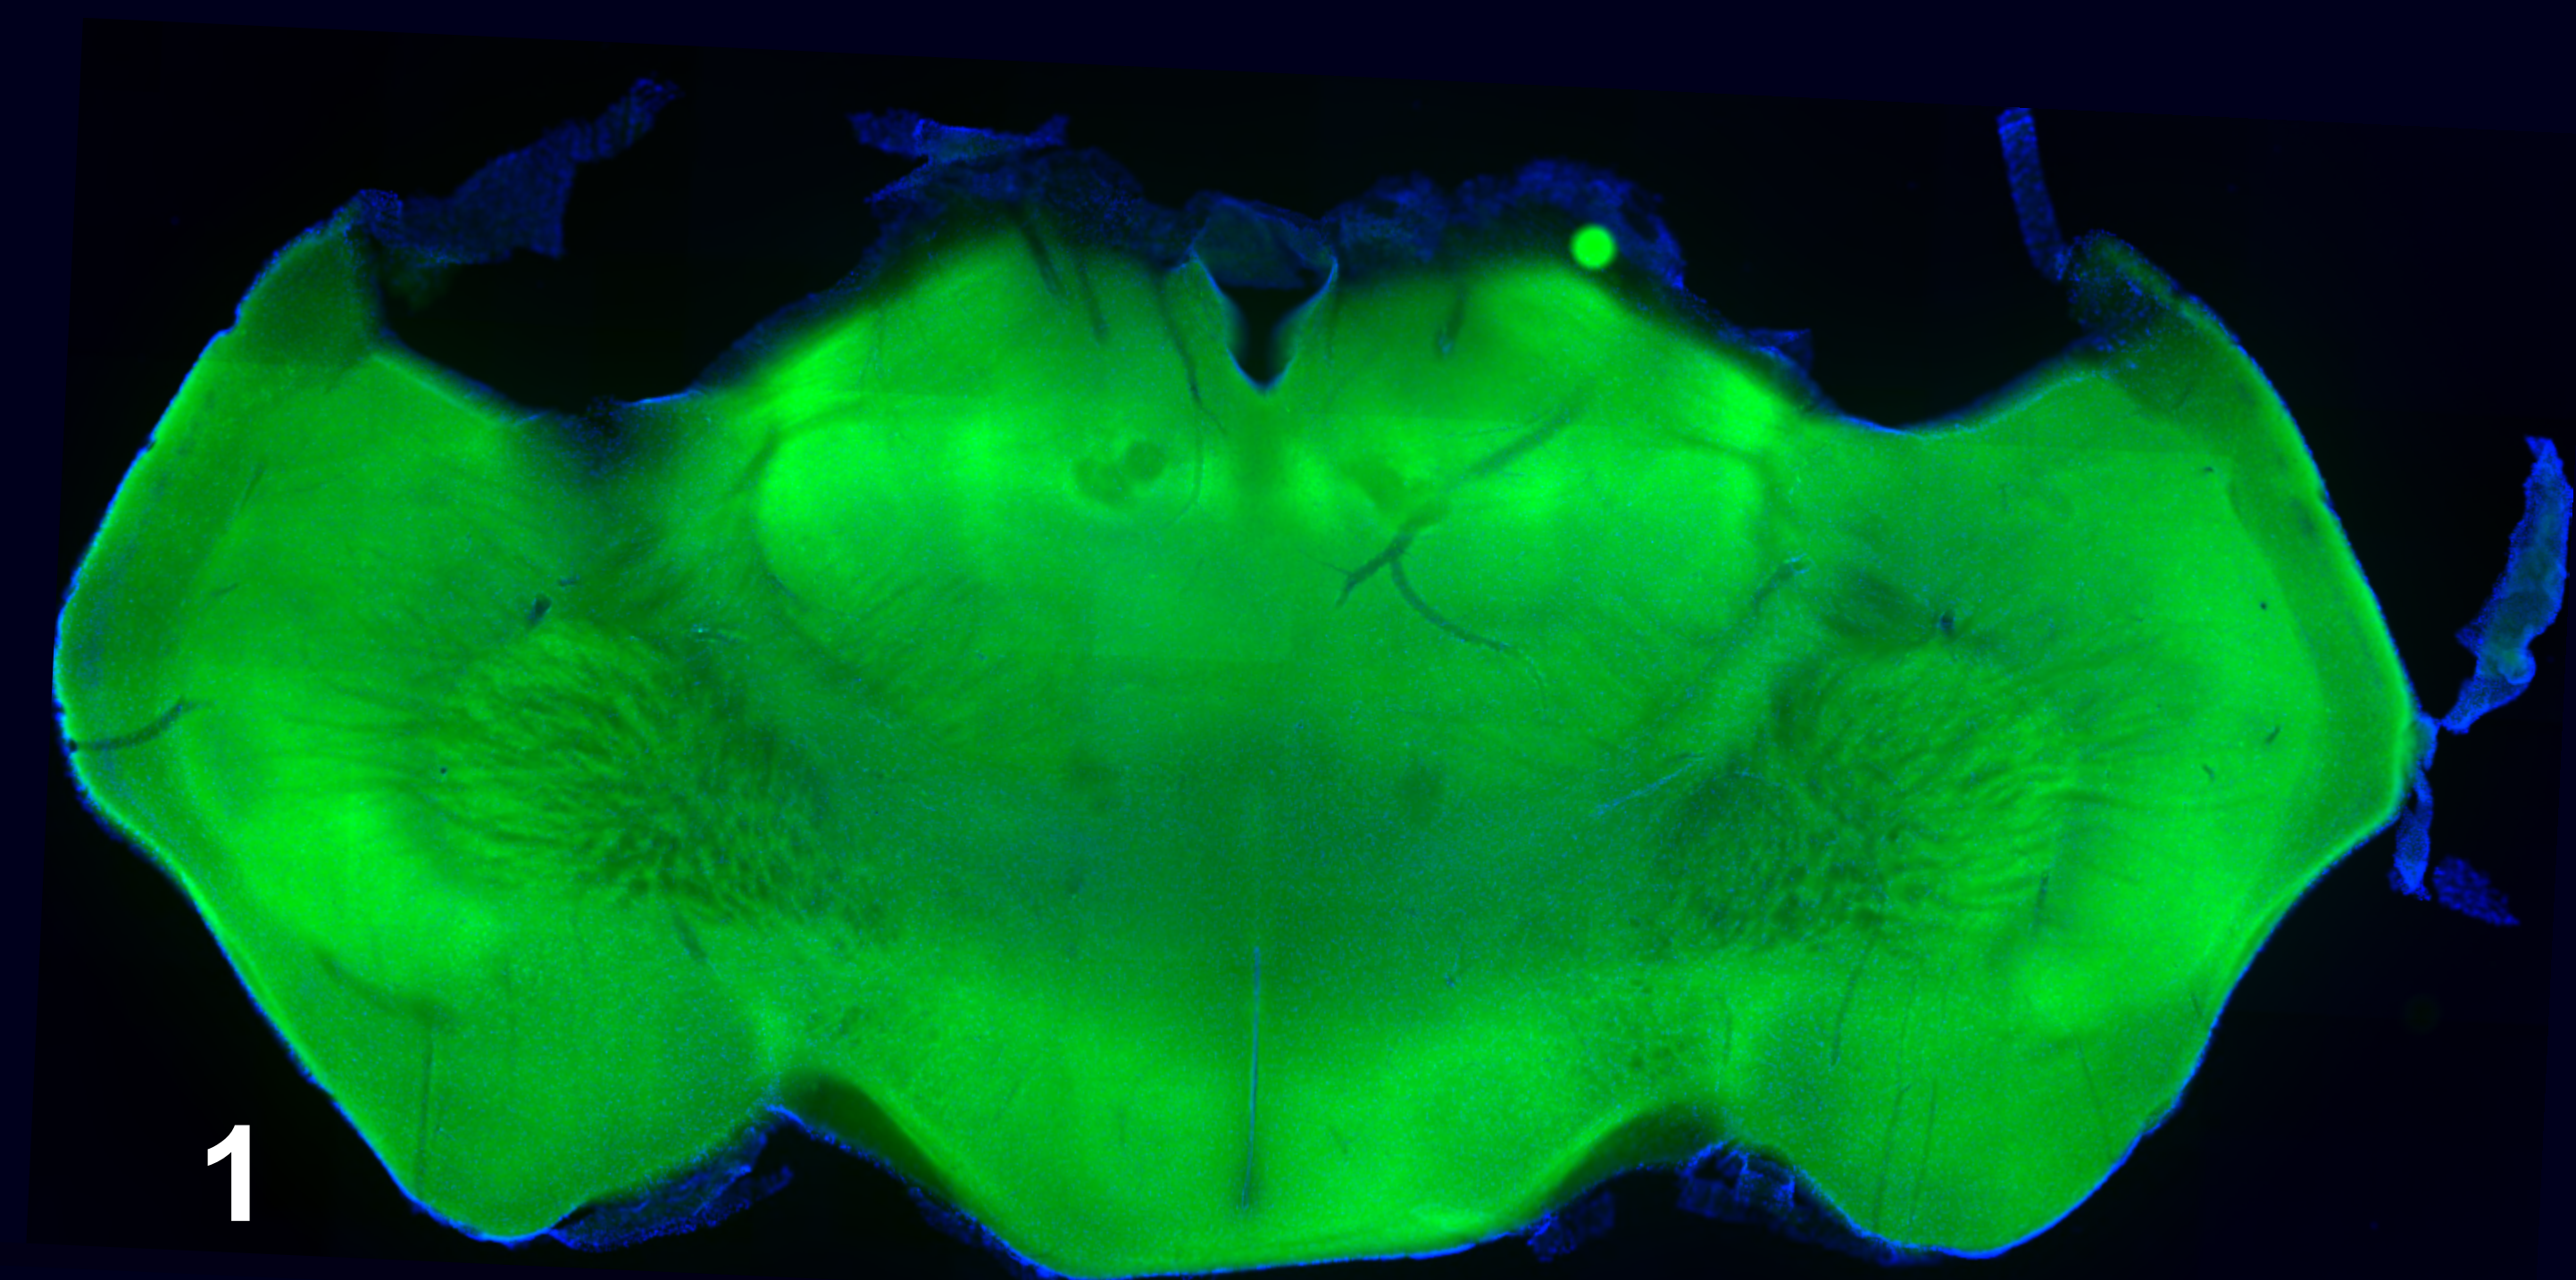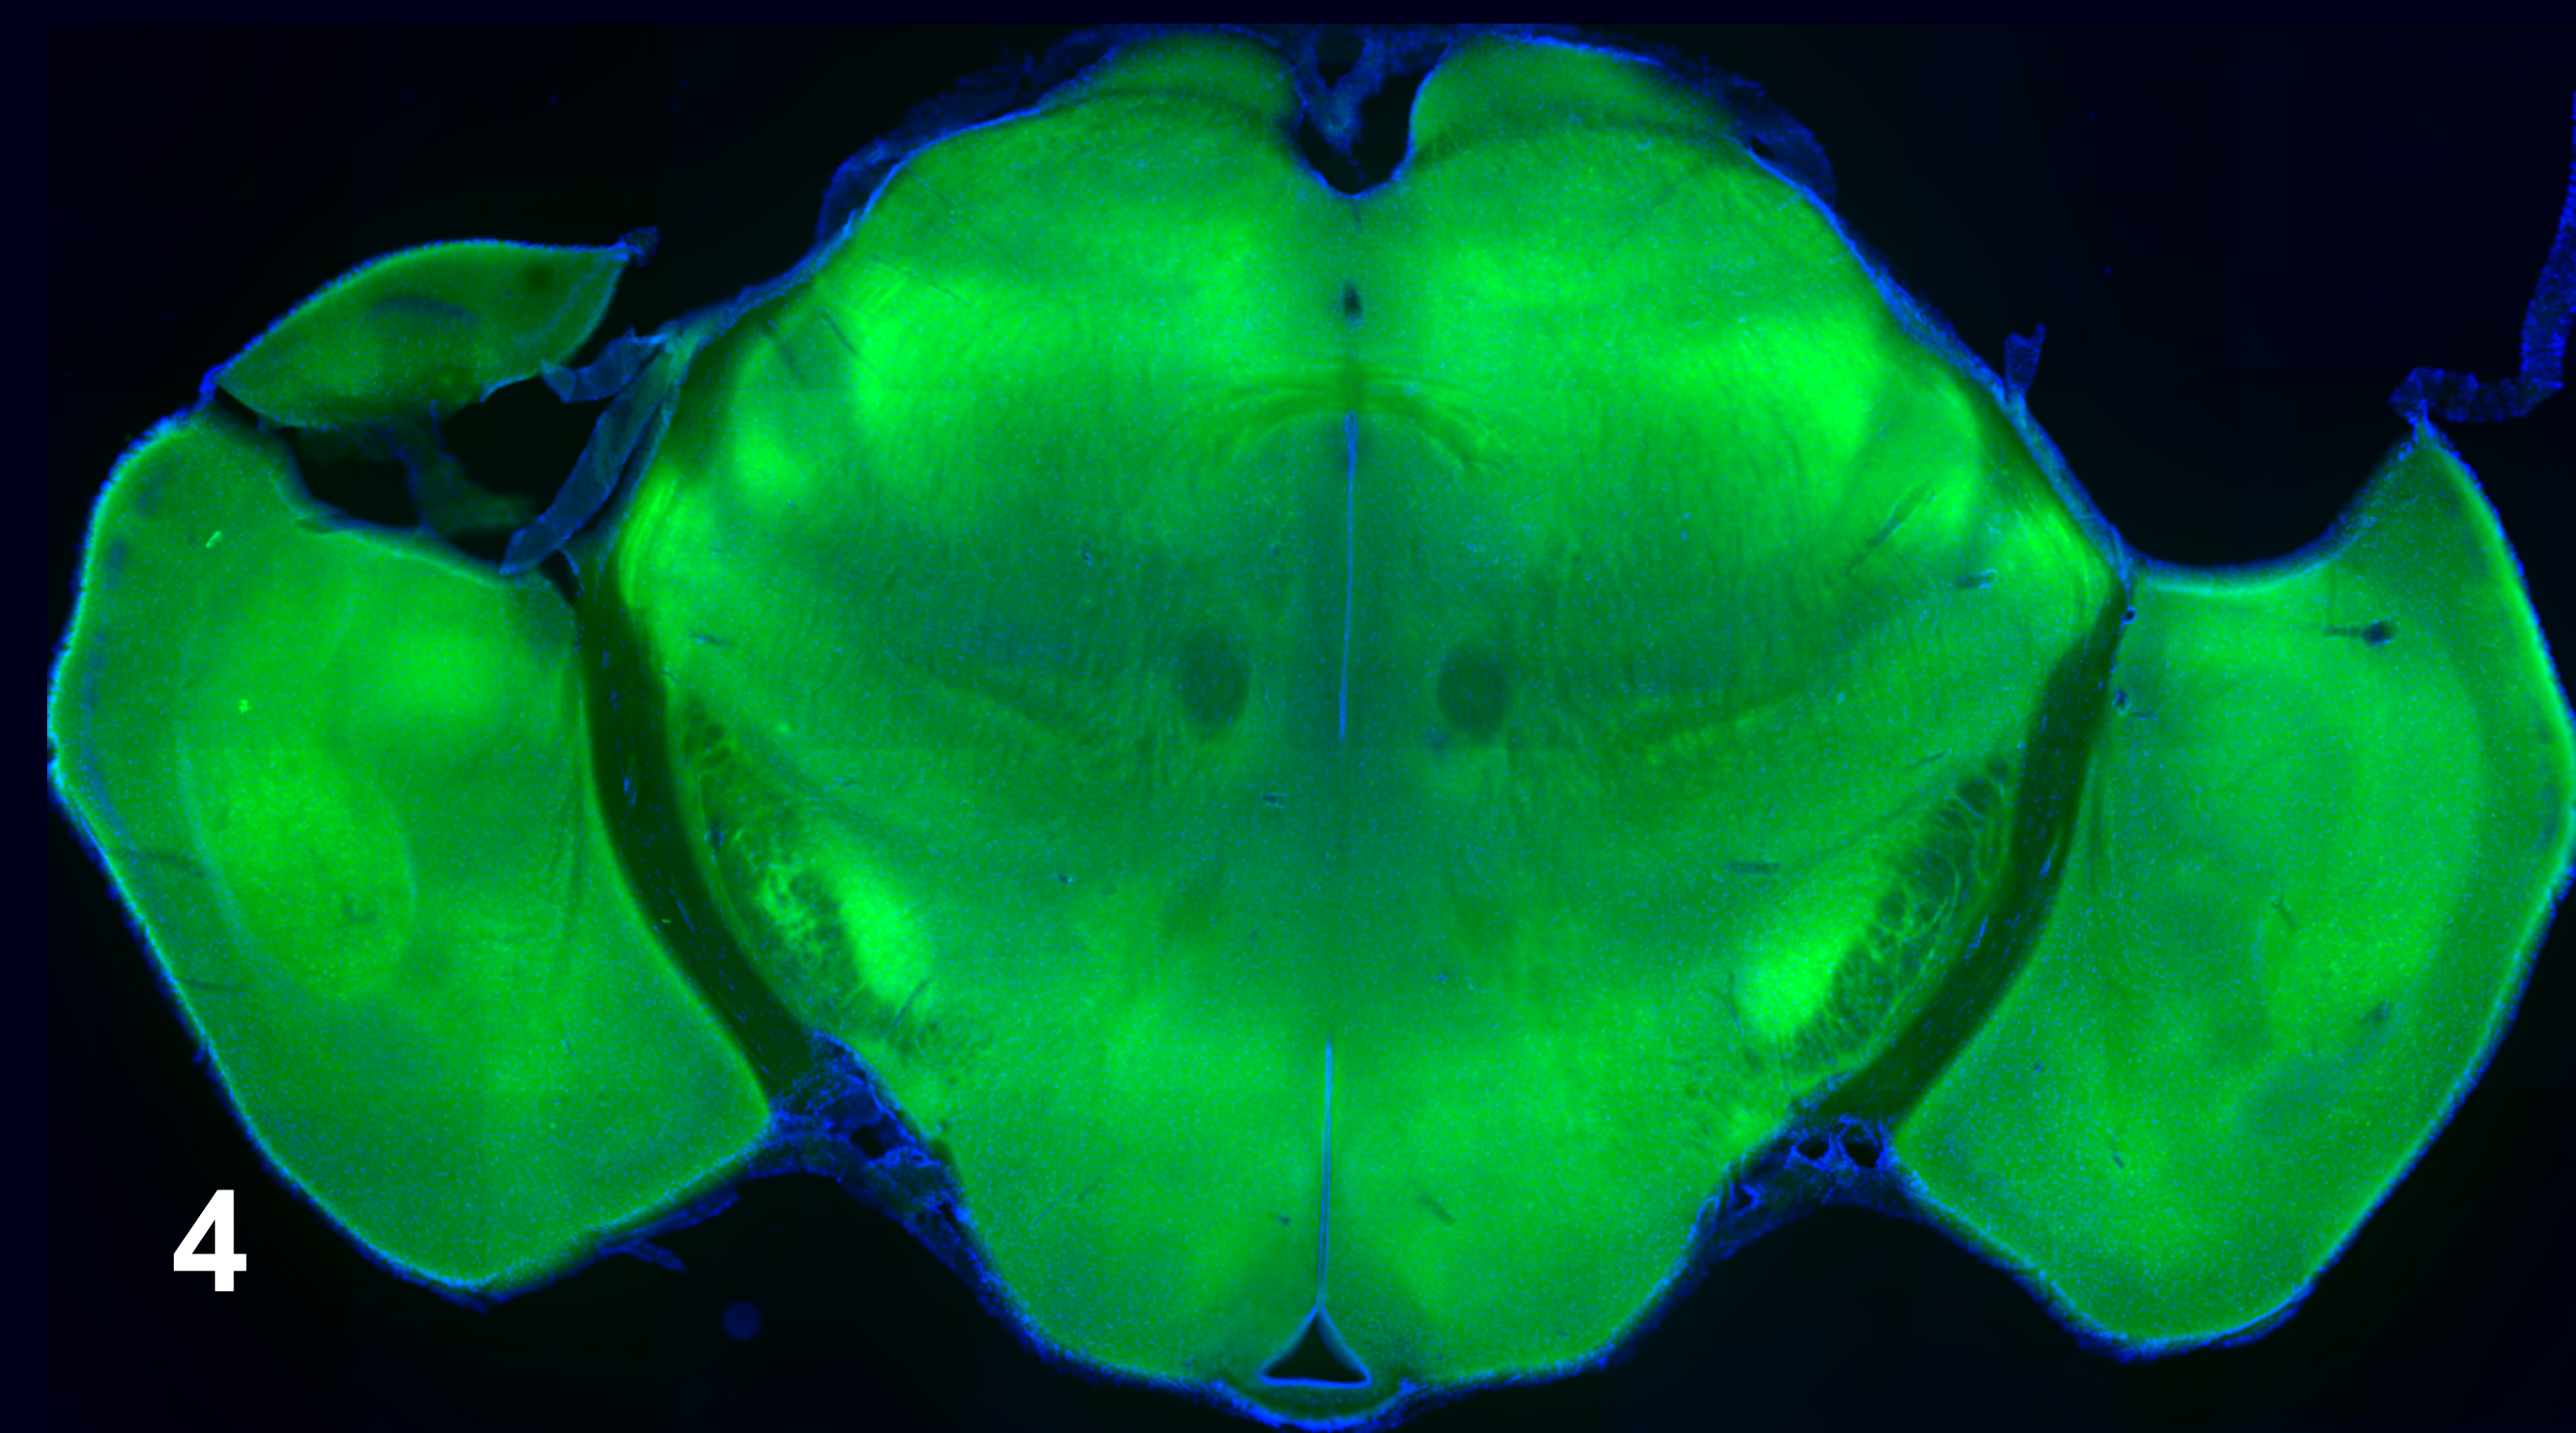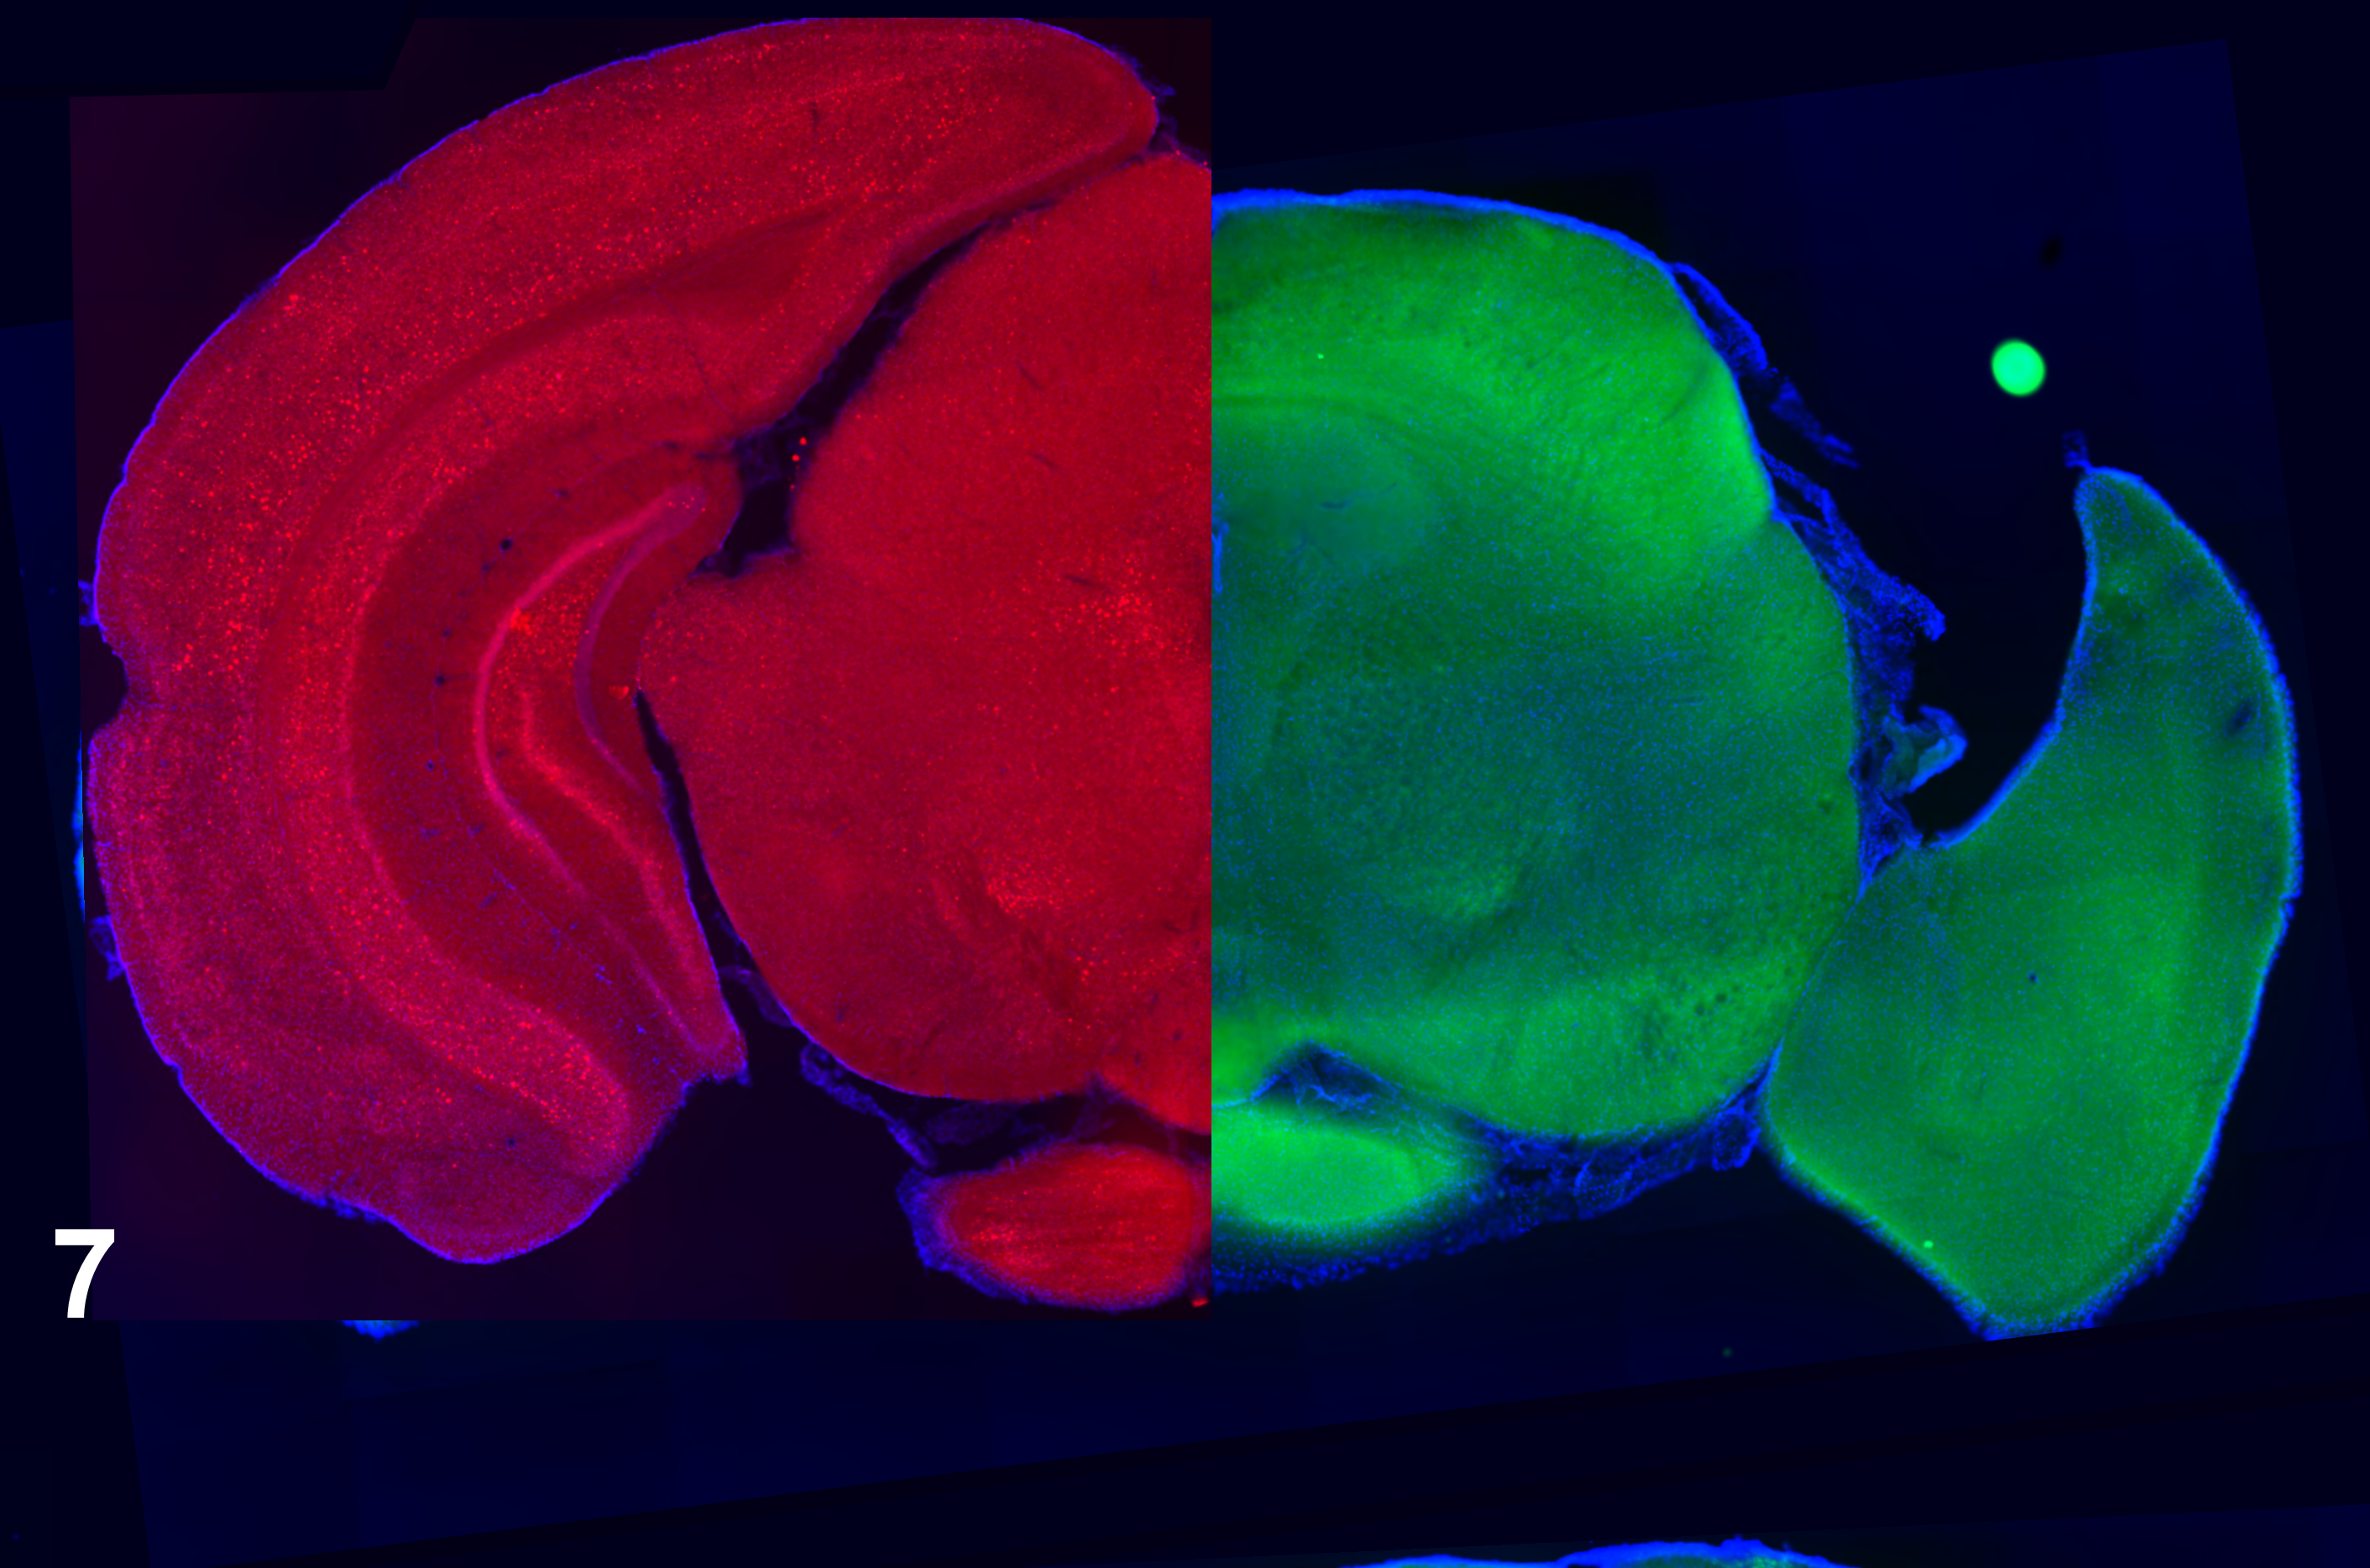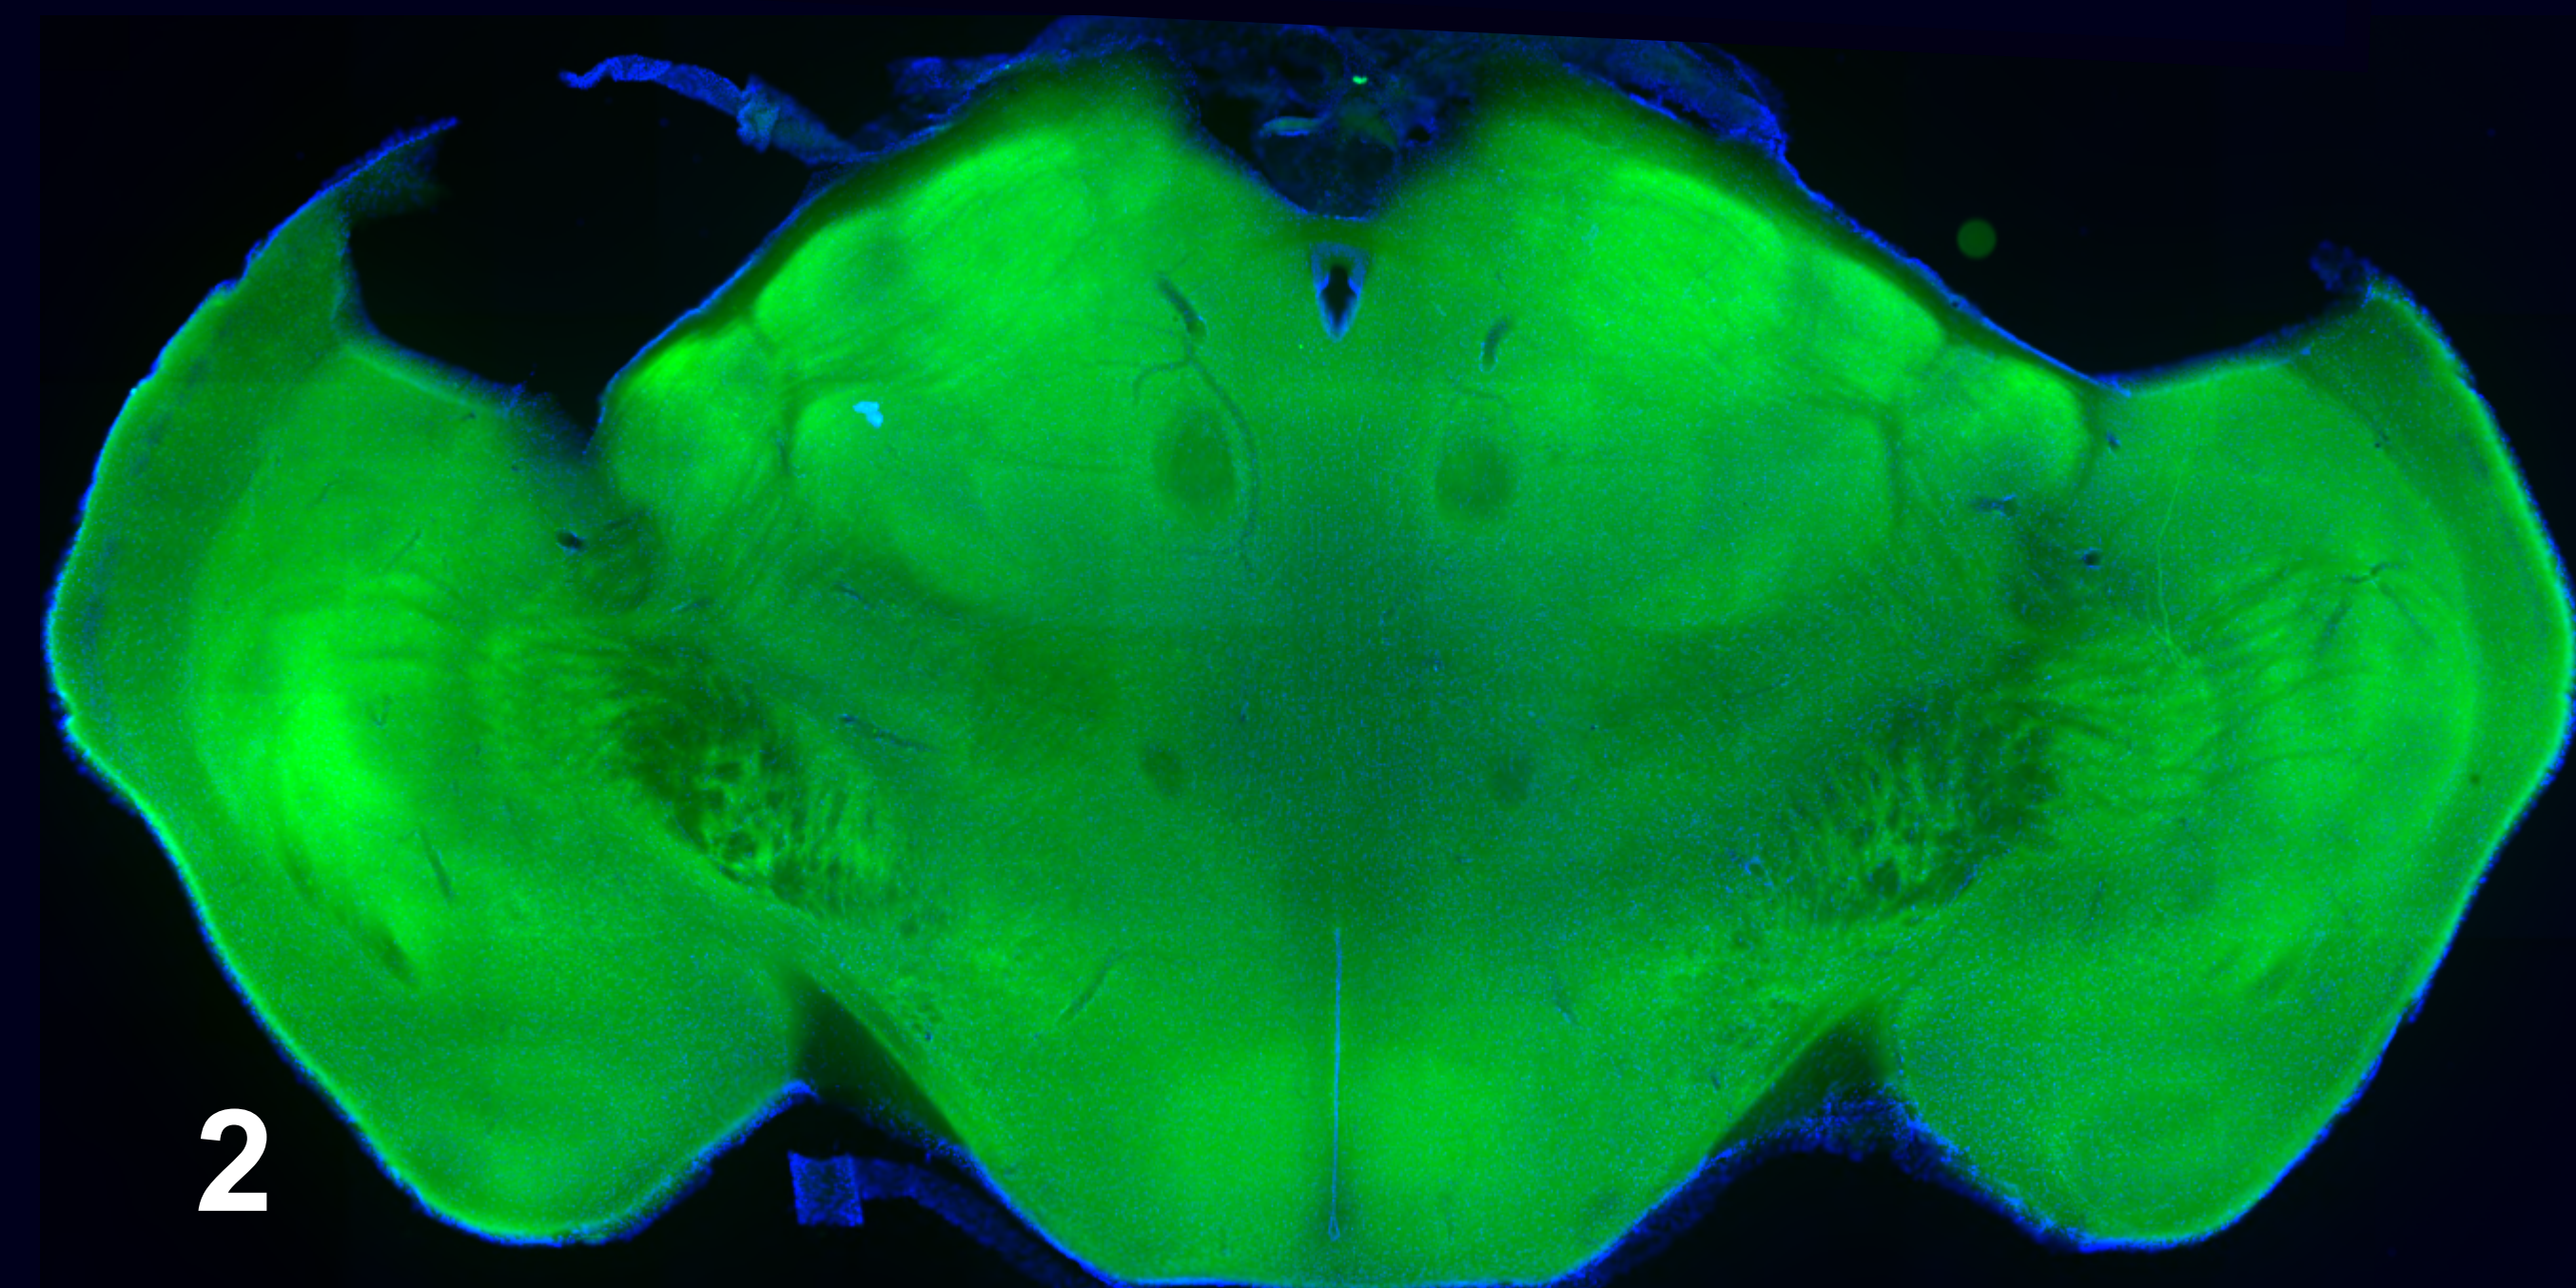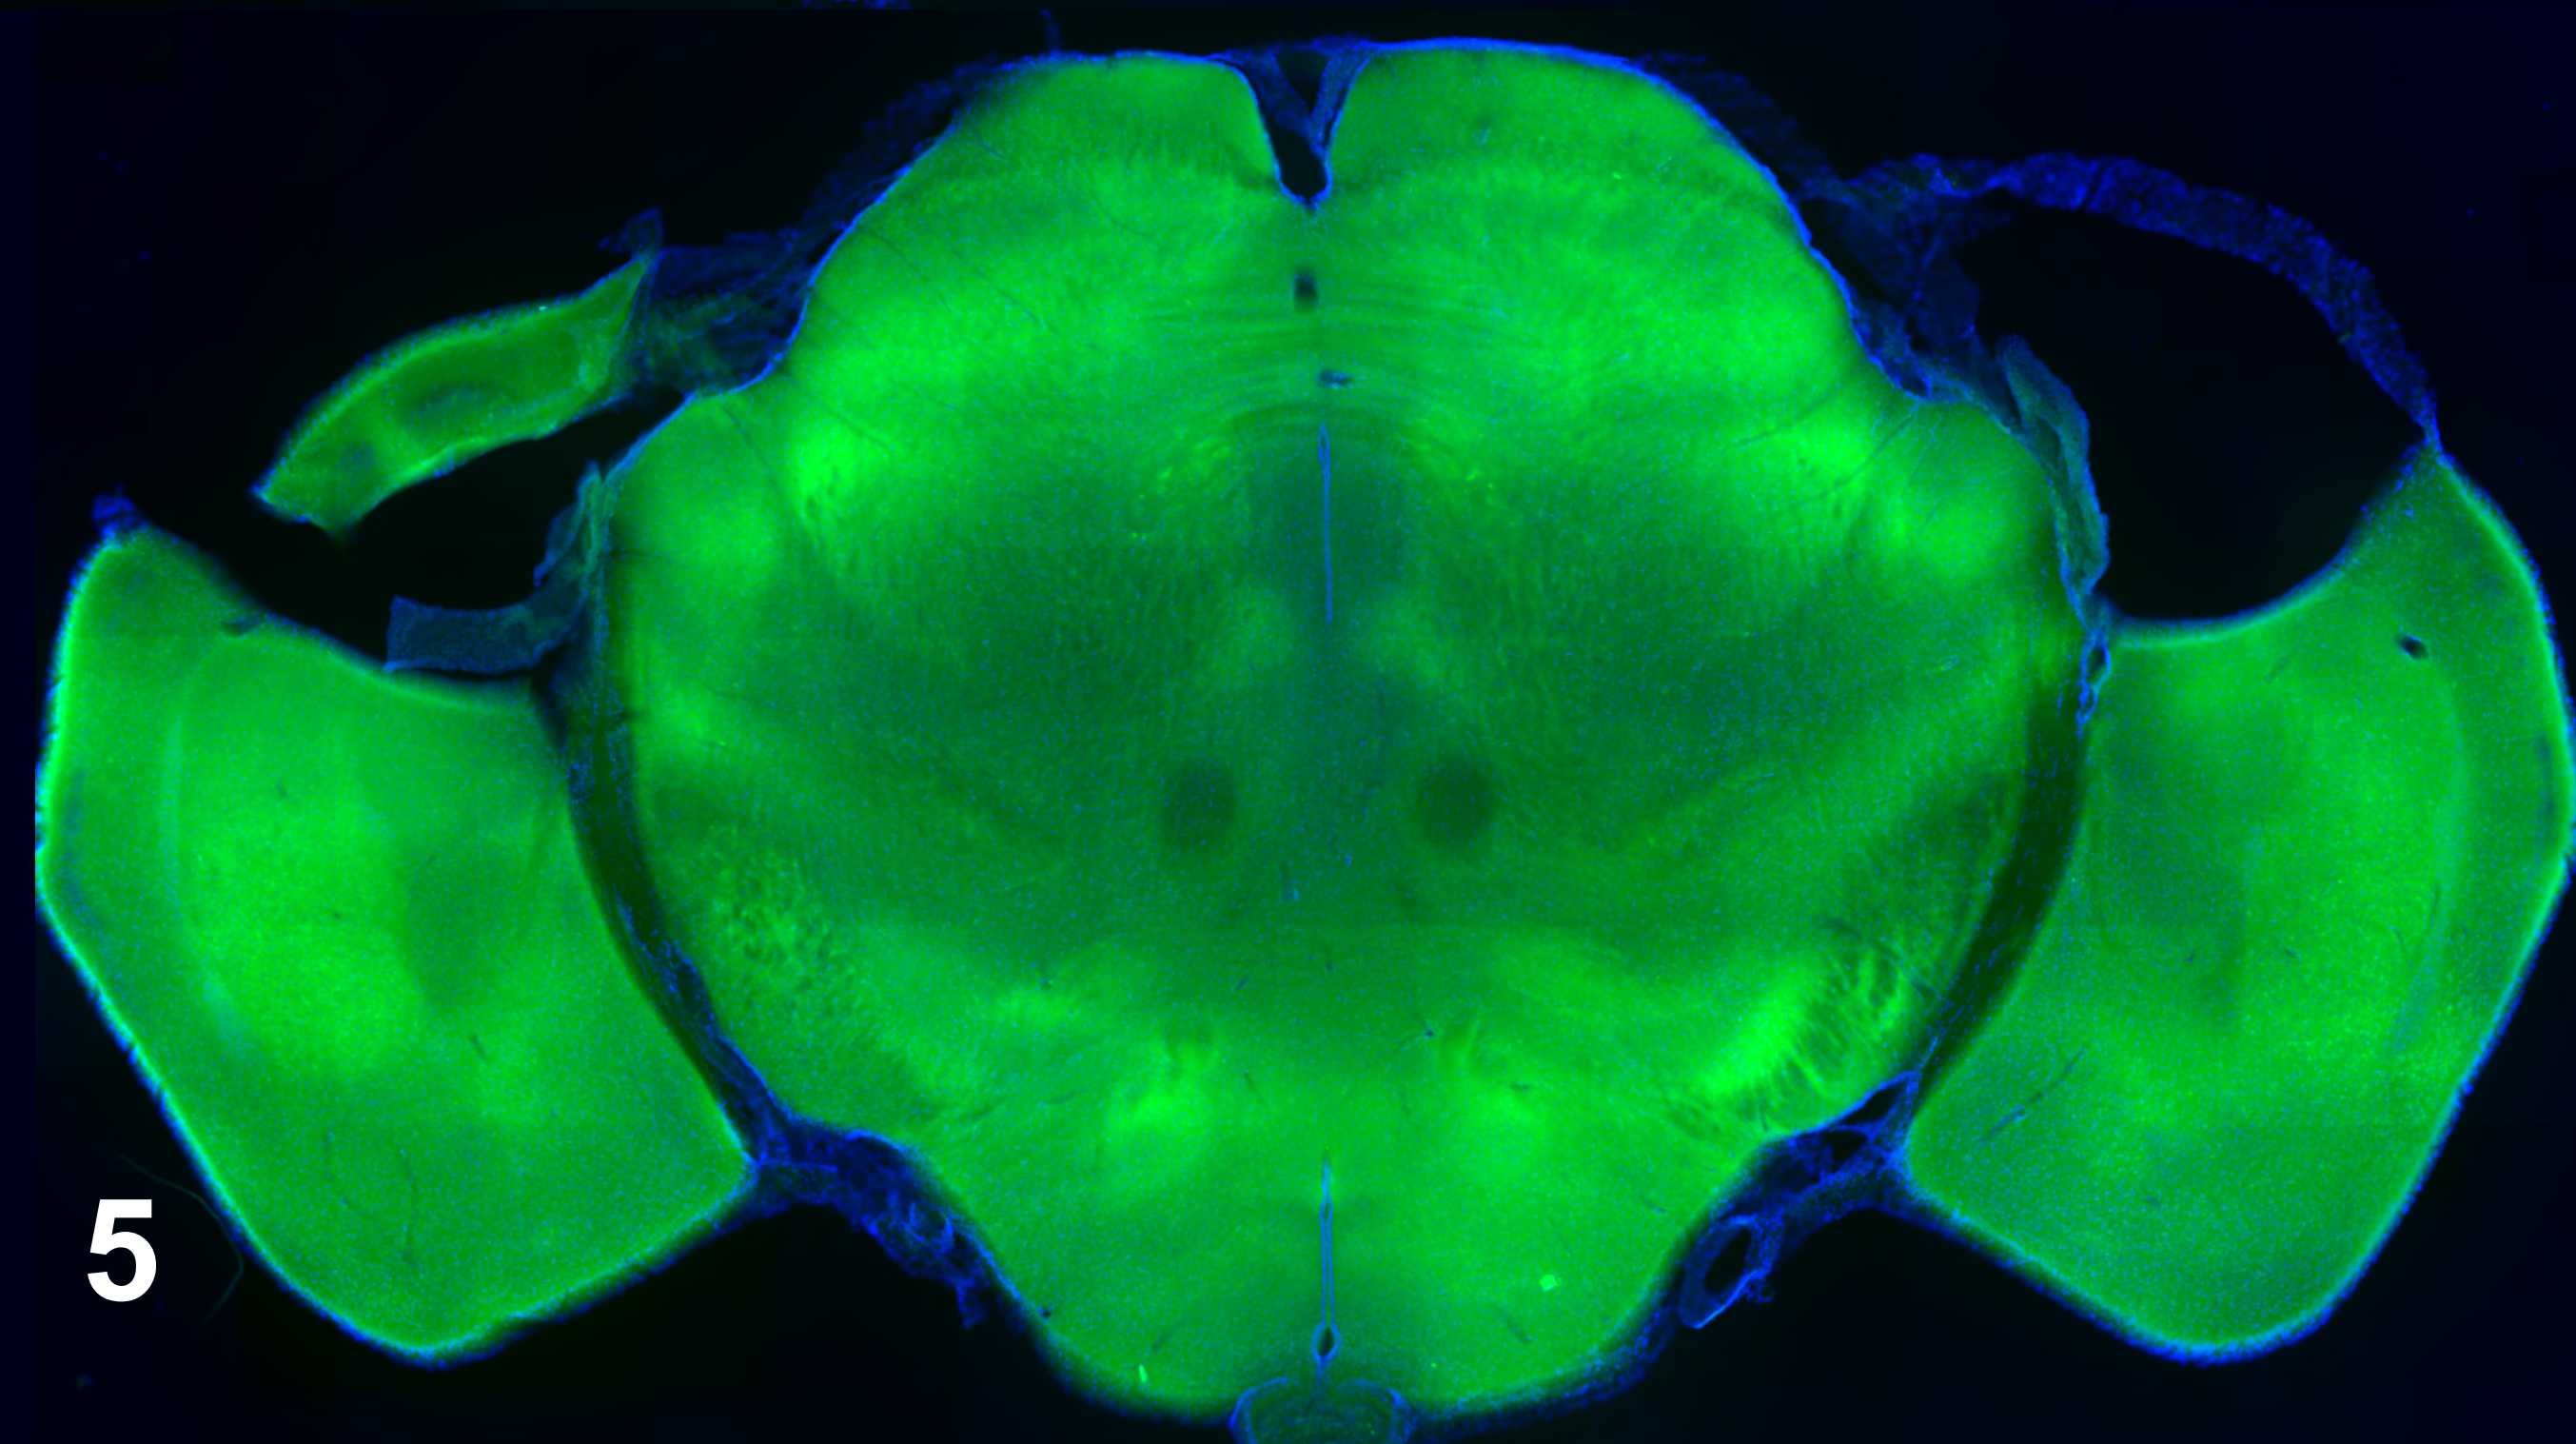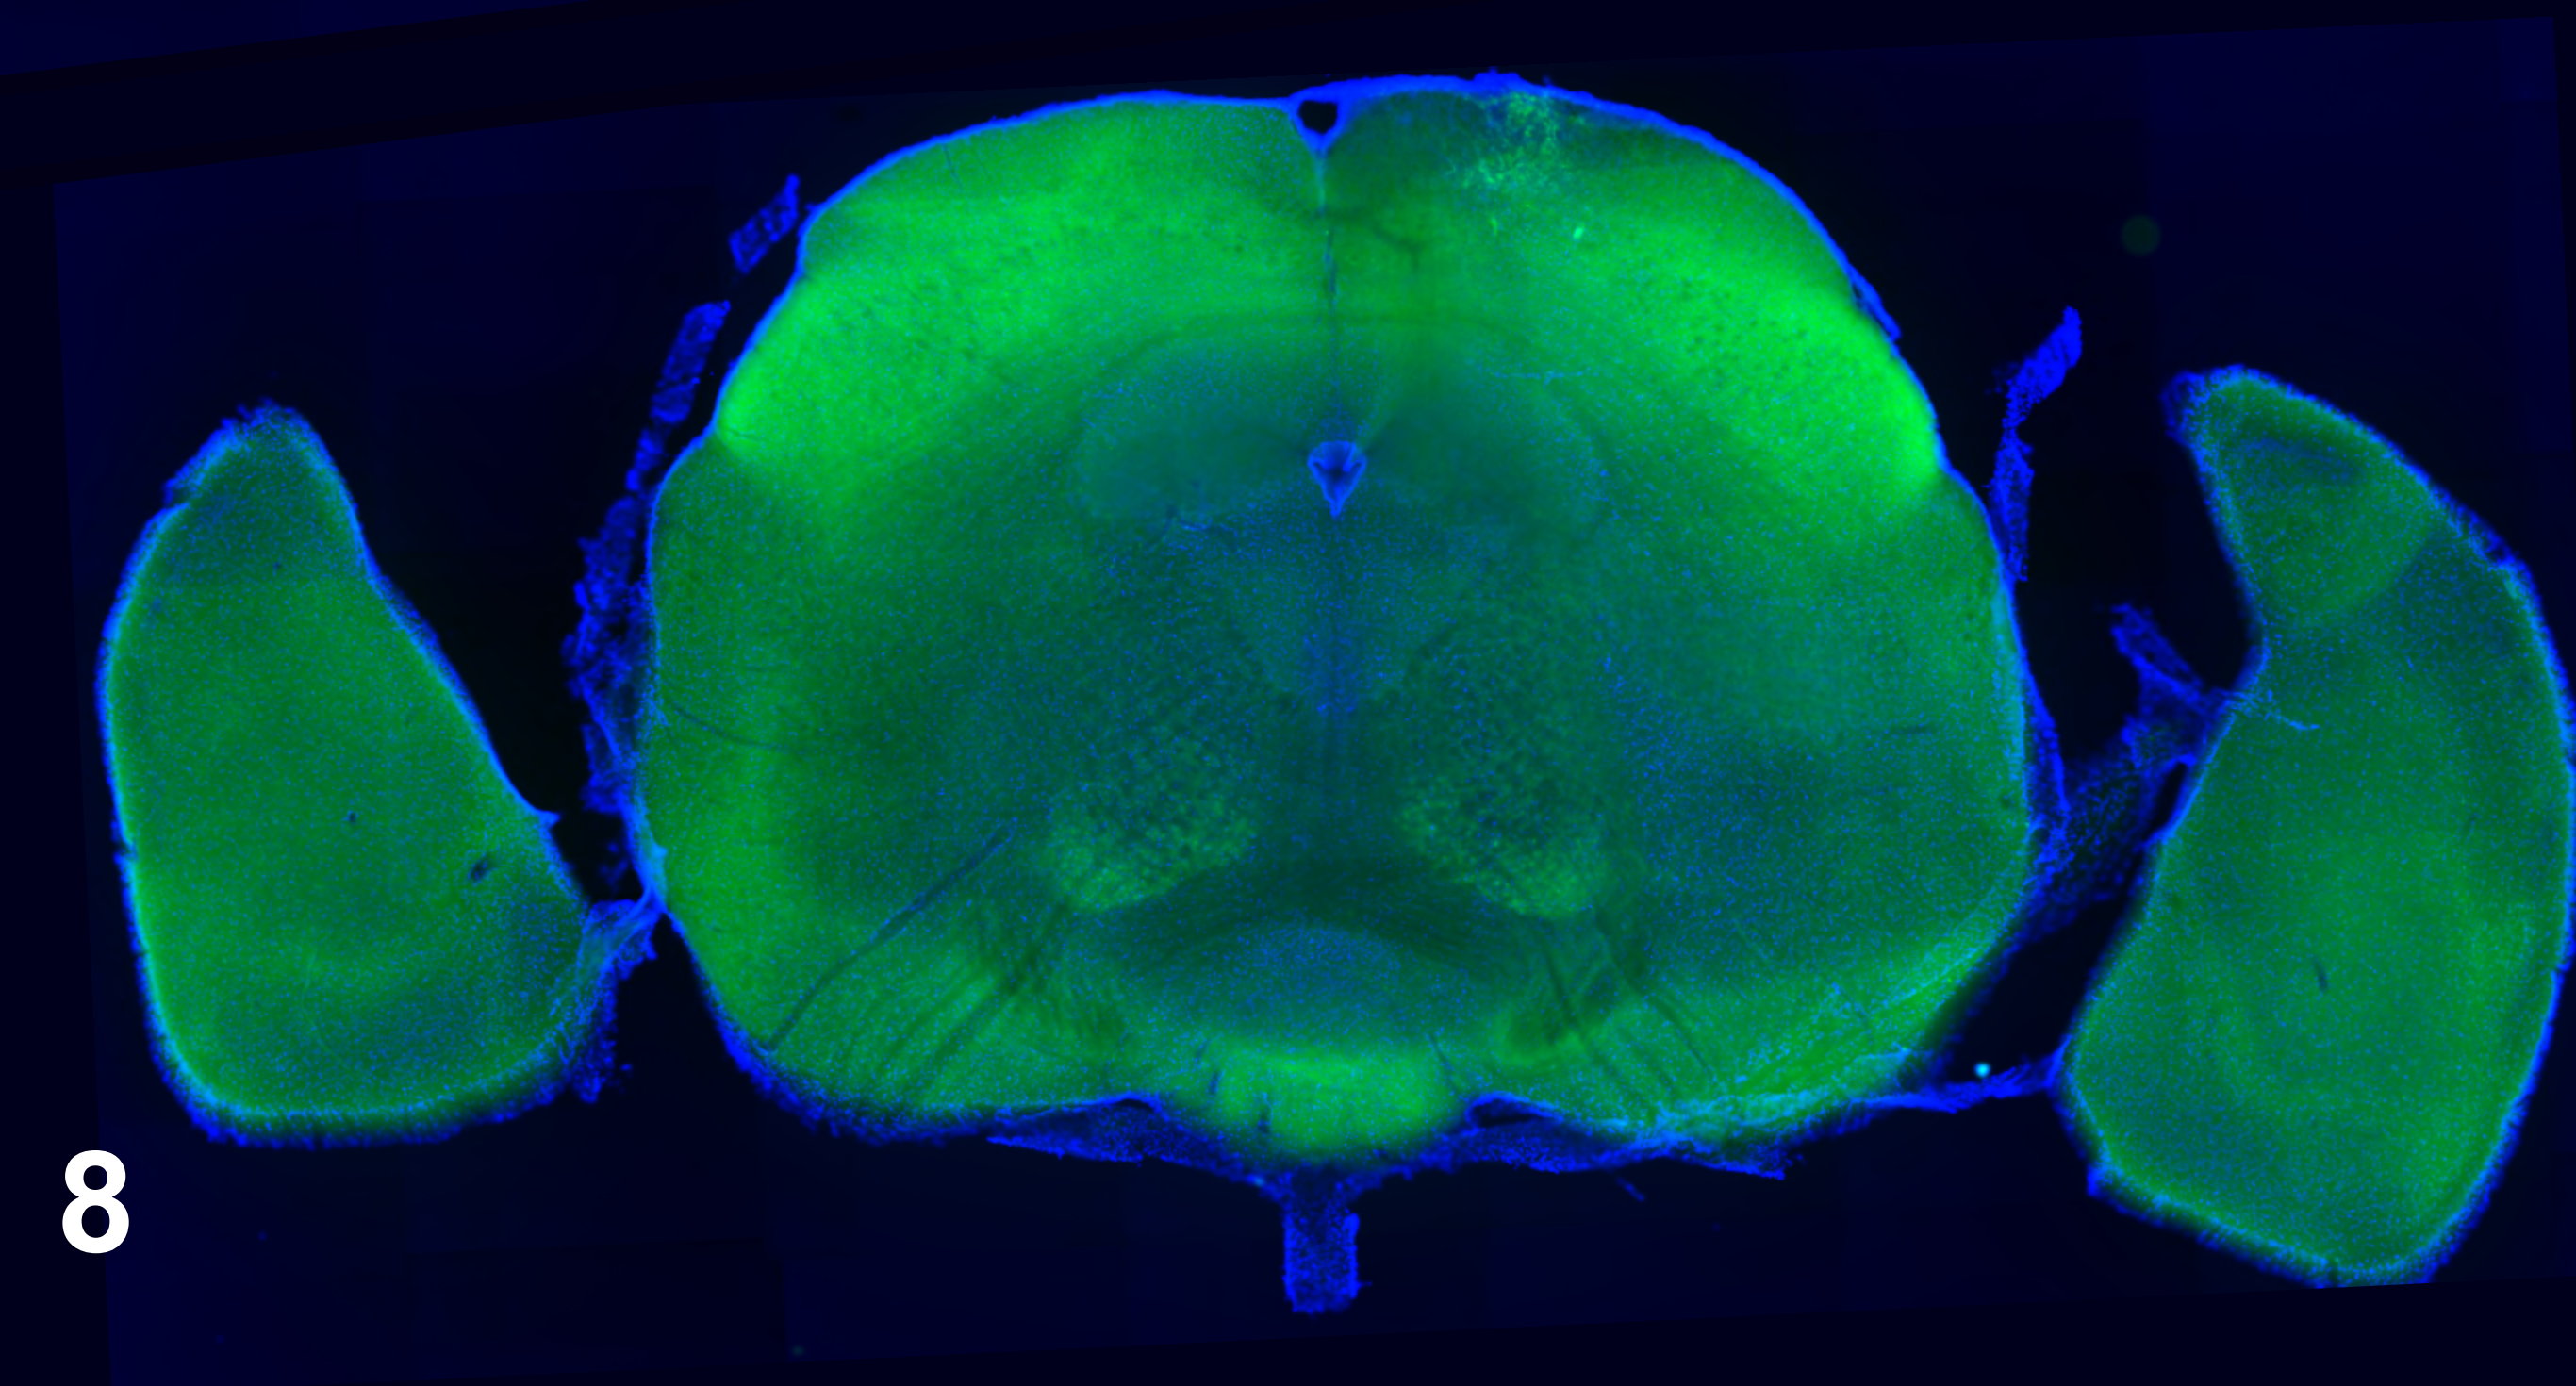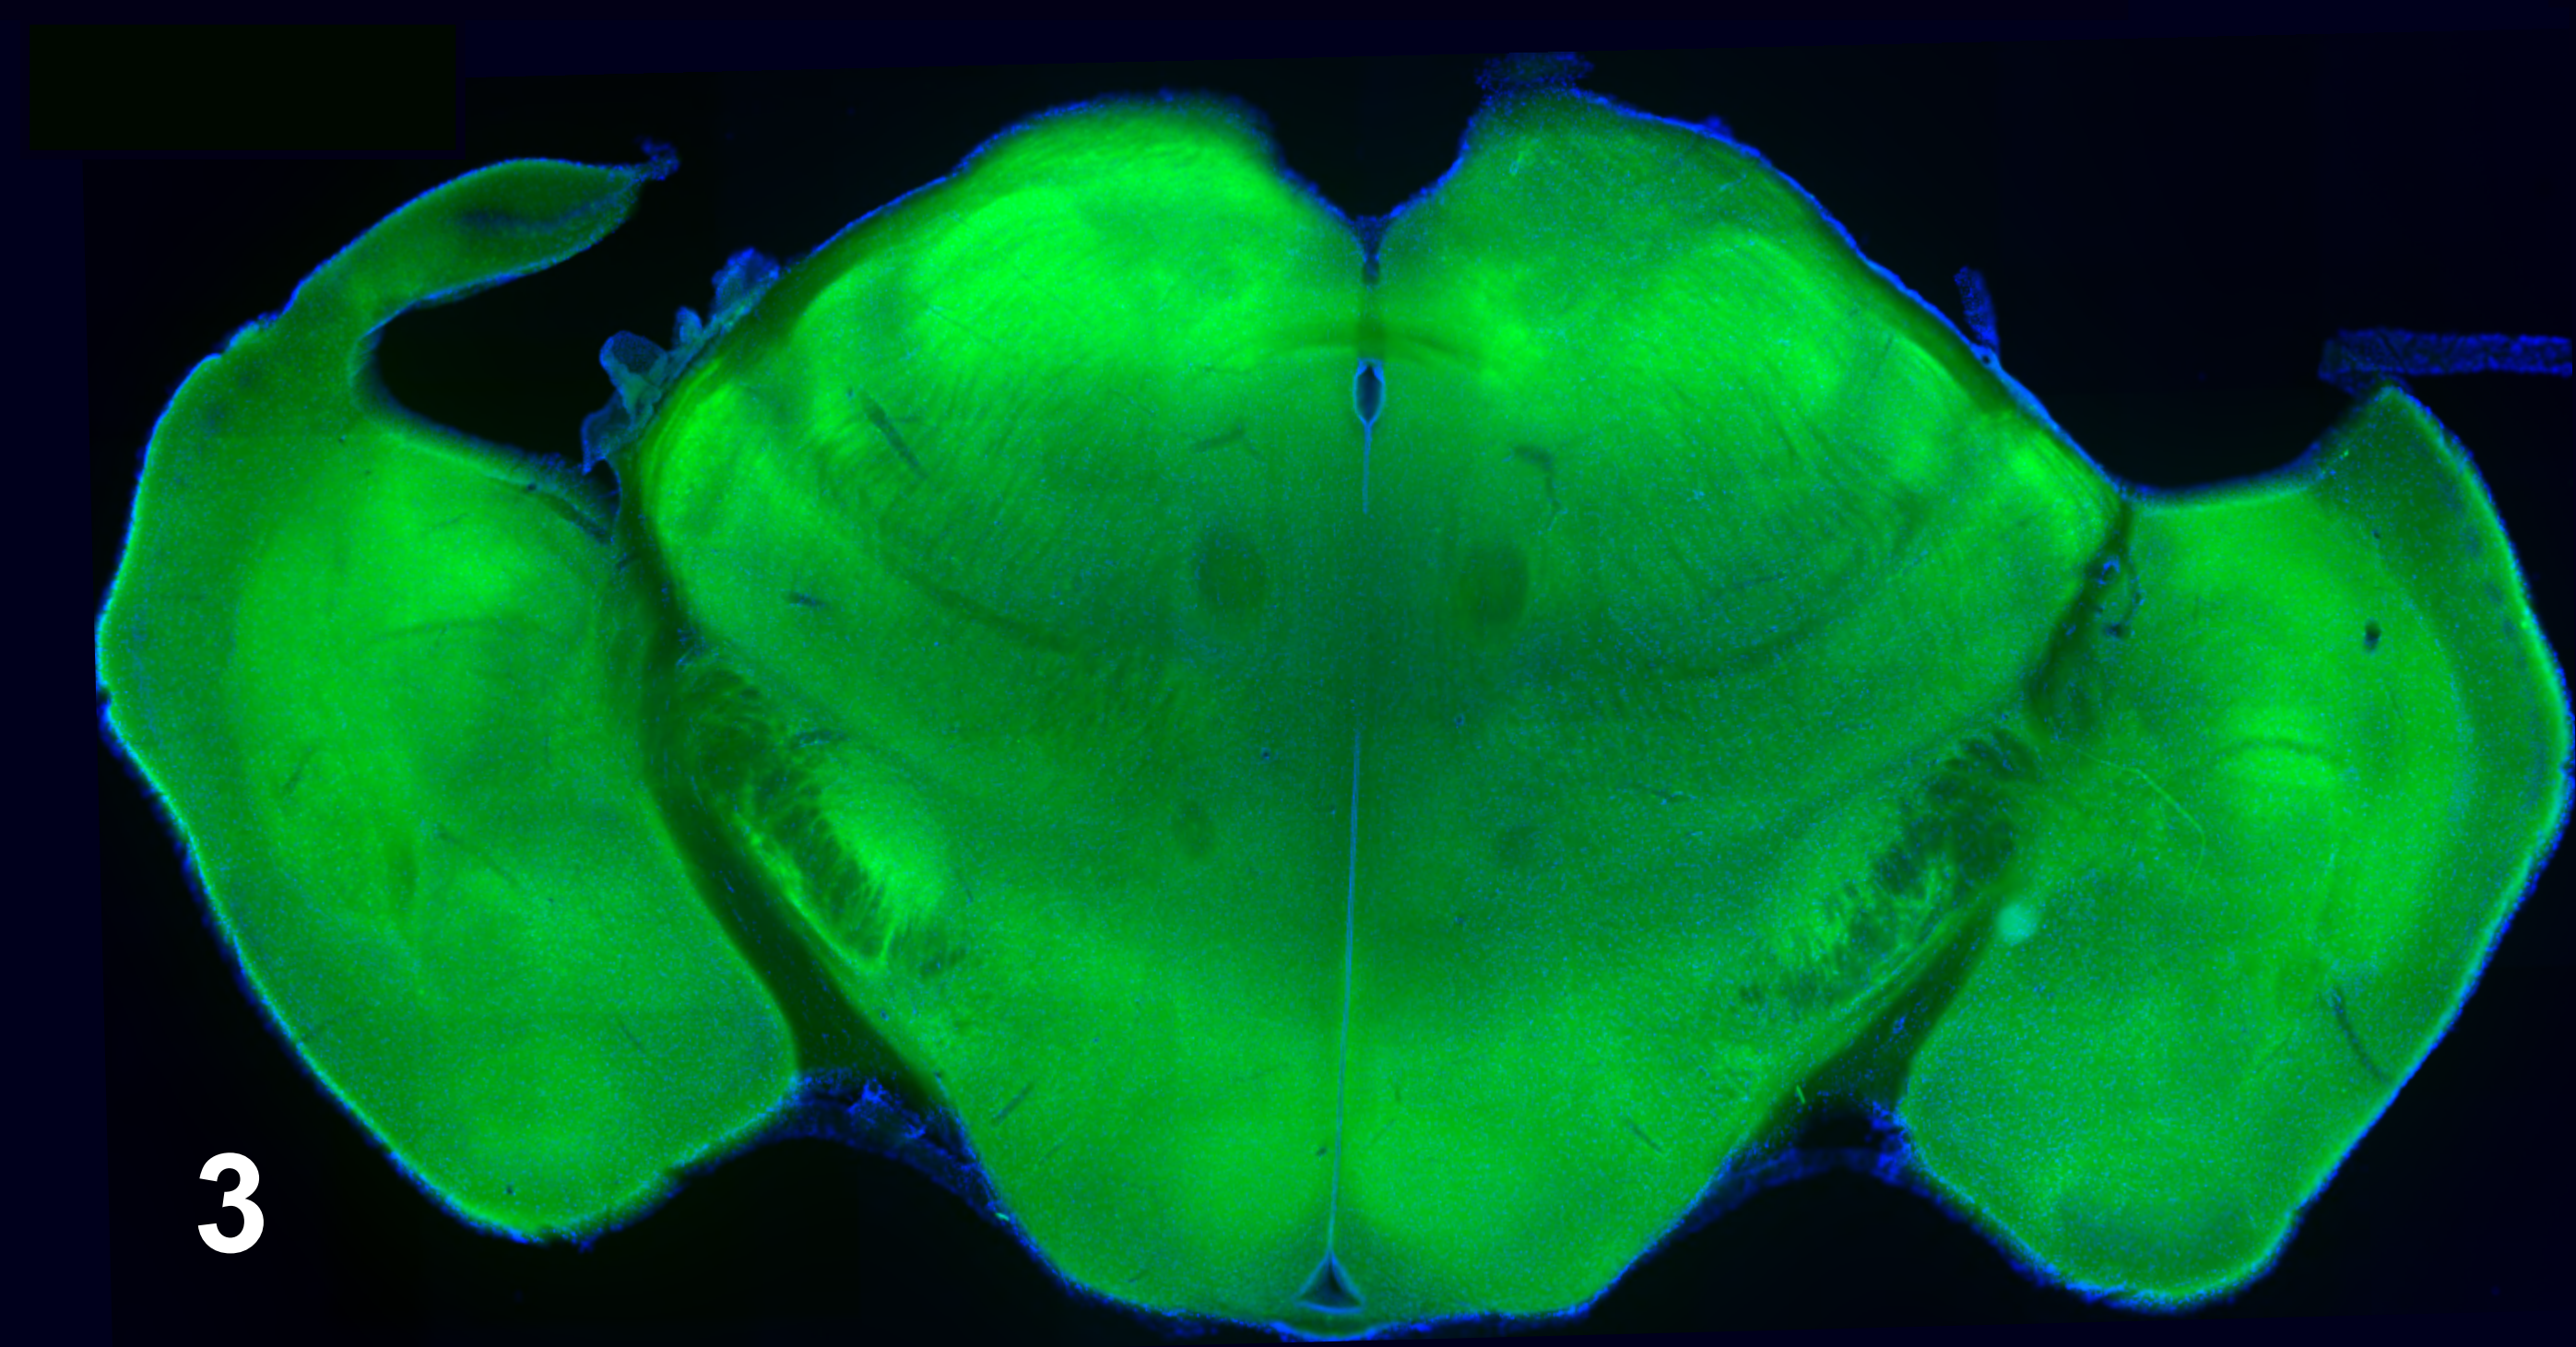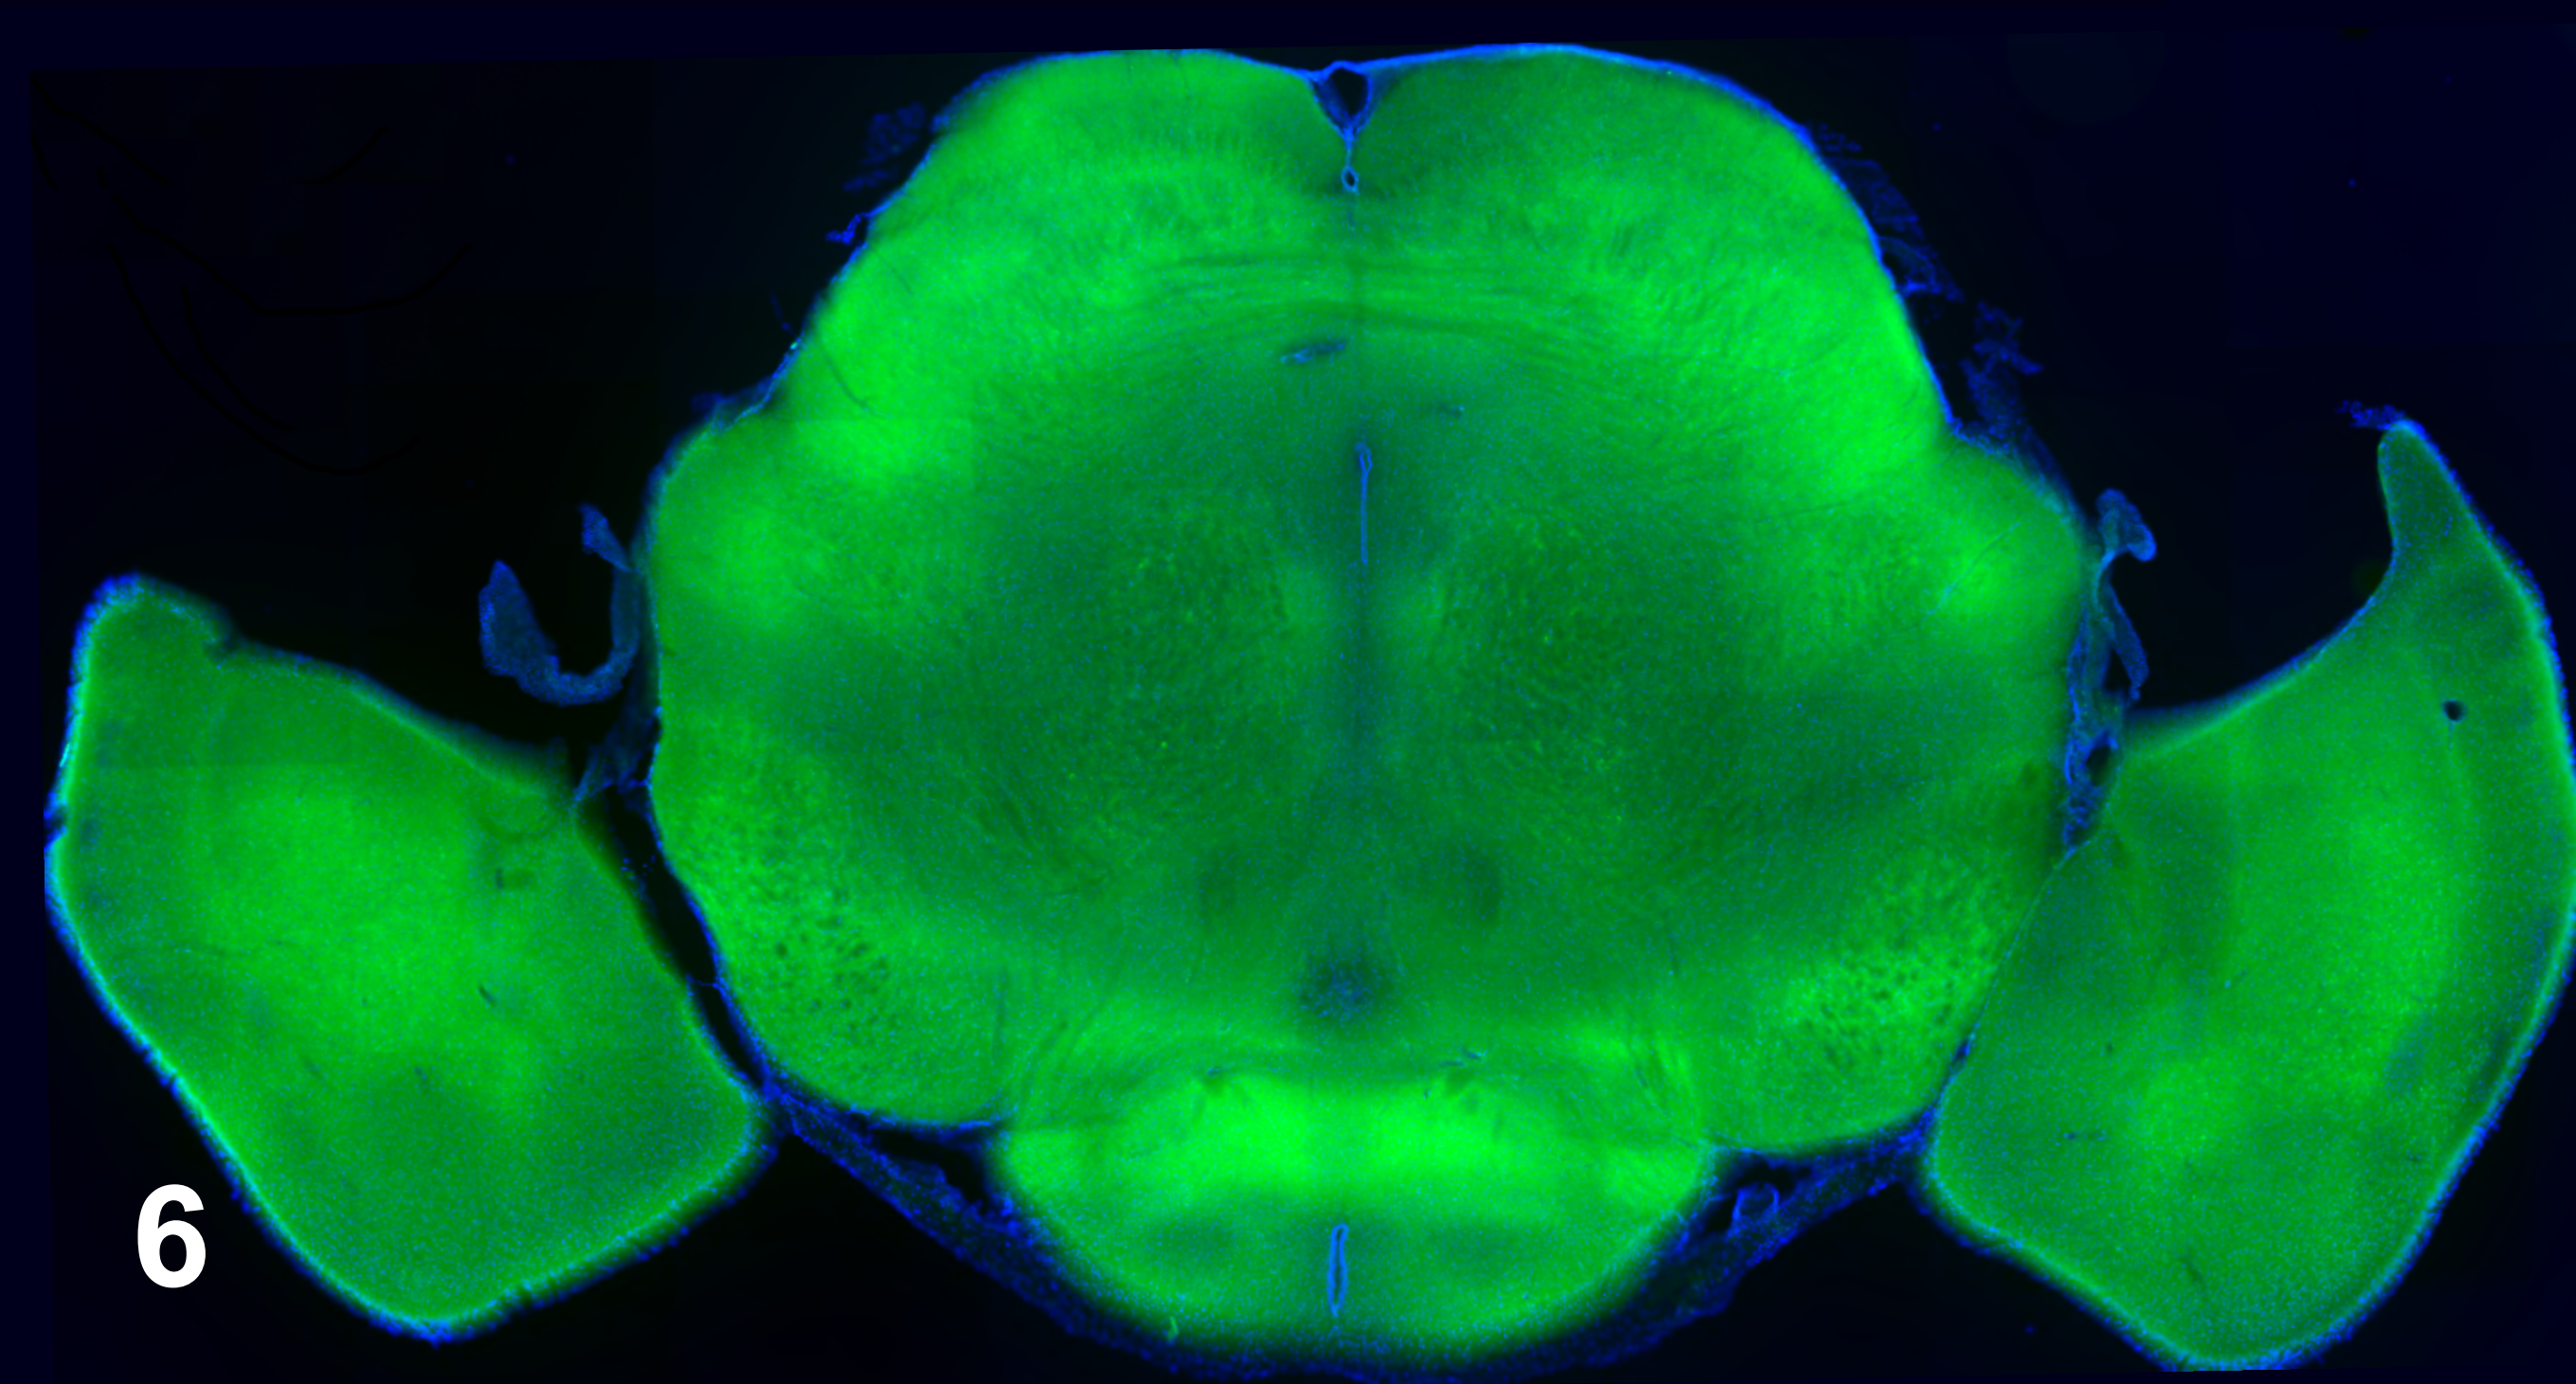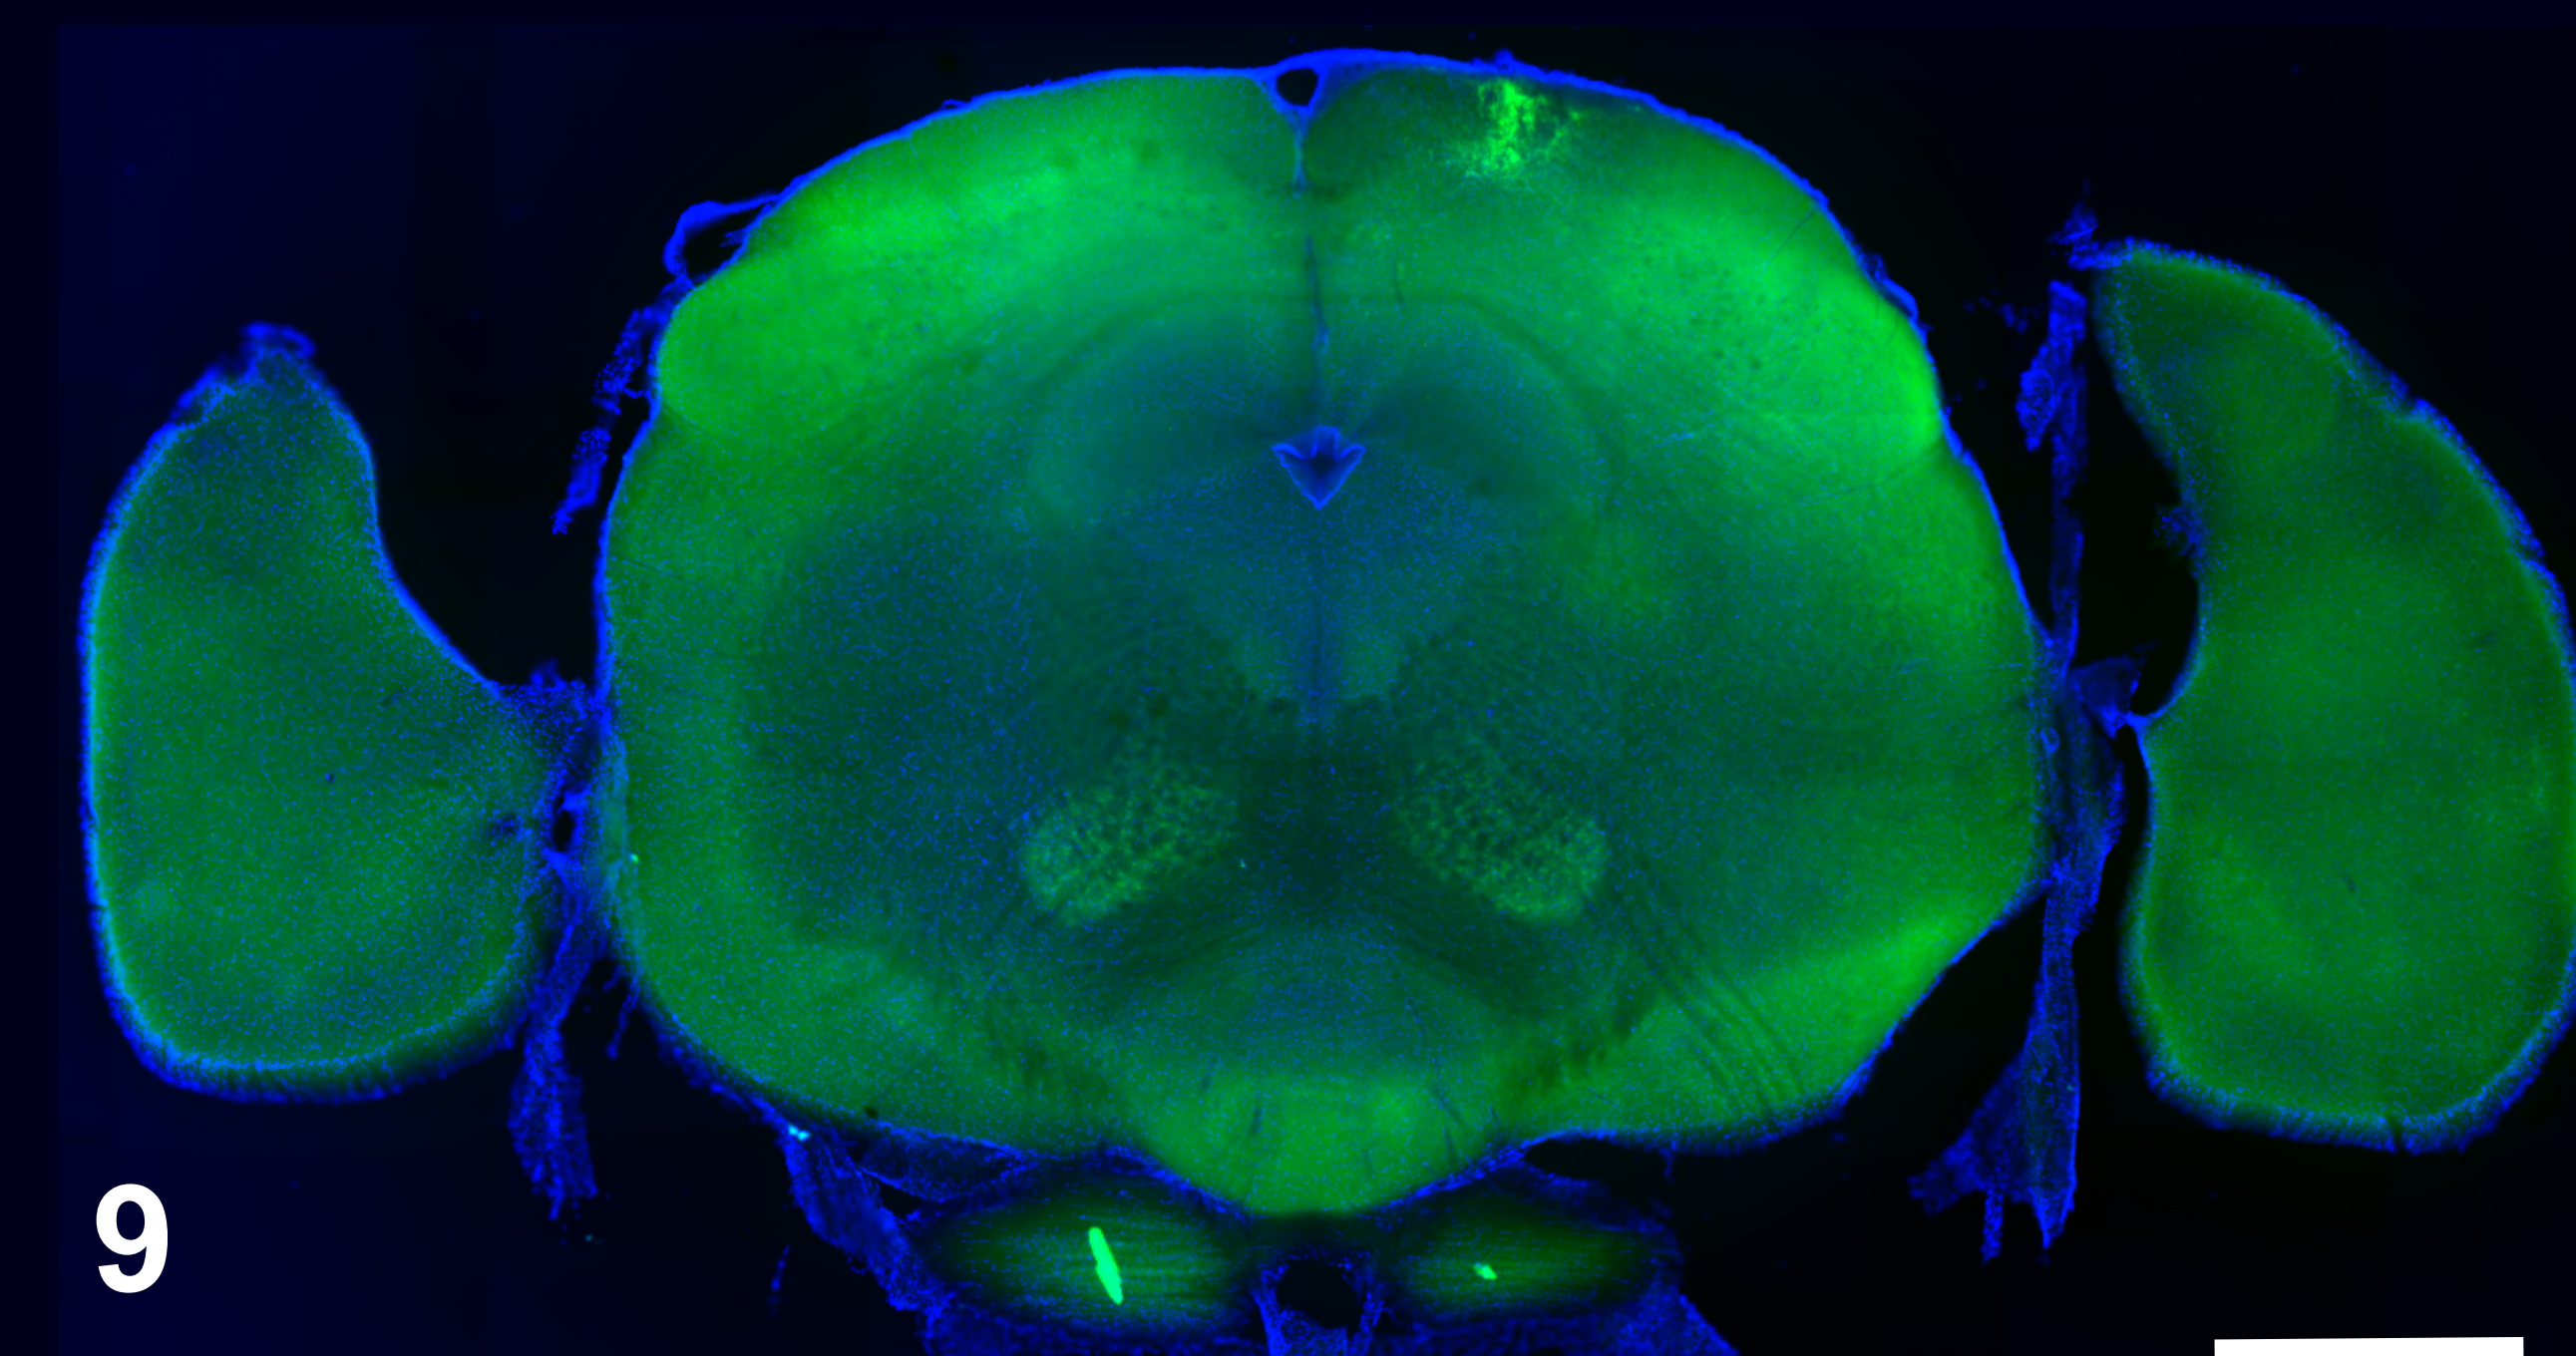

1 mm

Supplement: supp [file elife-50678-supp-v1.zip]

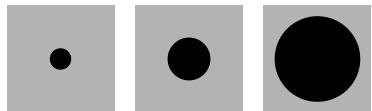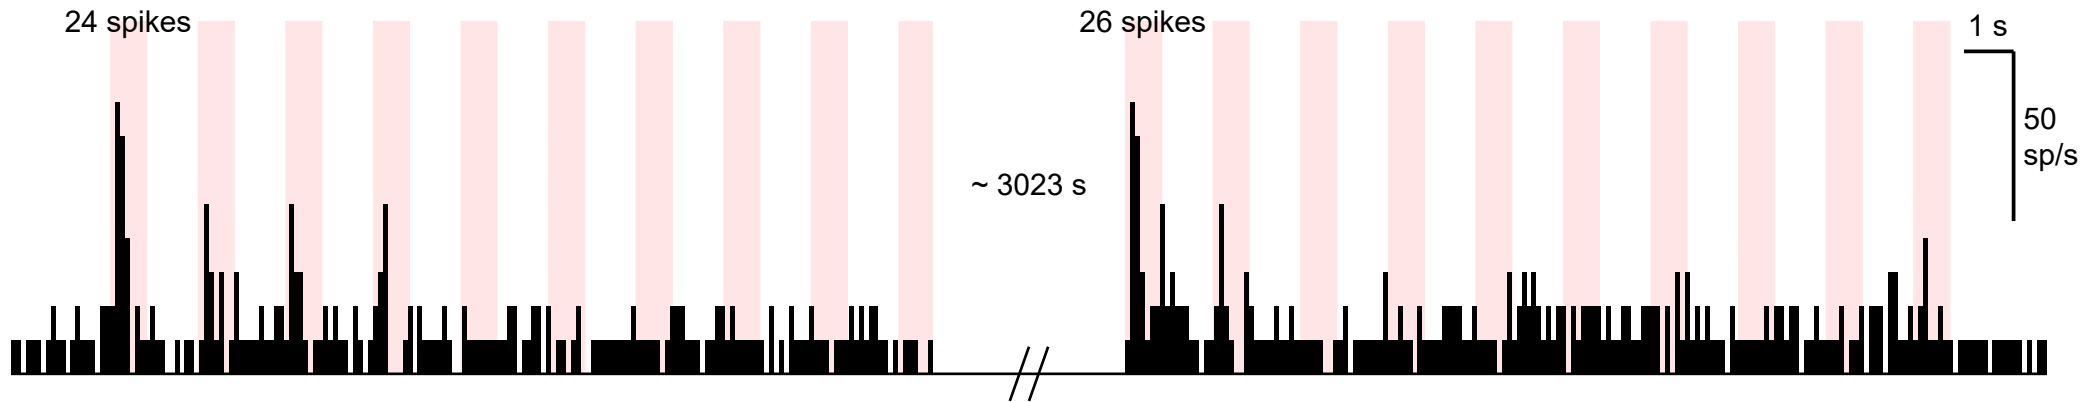

Supplement: supp [file elife-50678-supp-v1.zip]

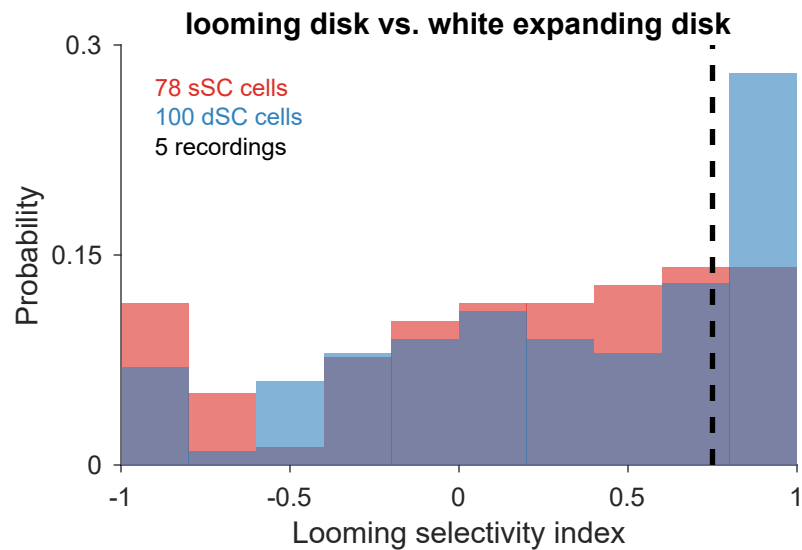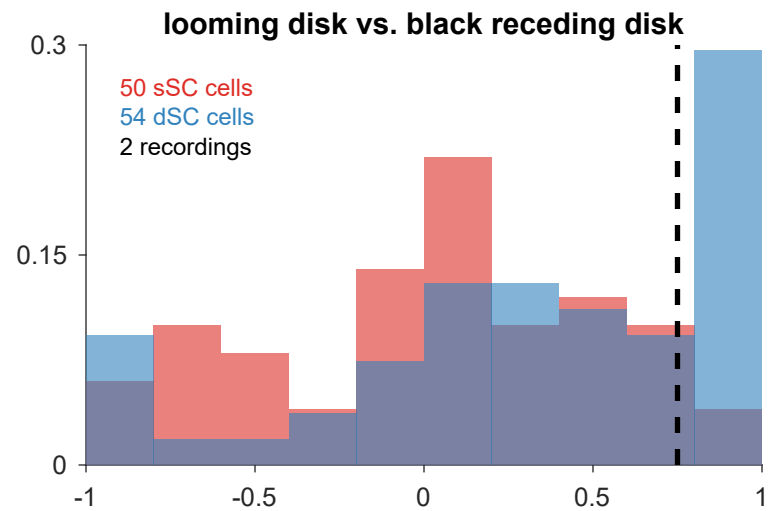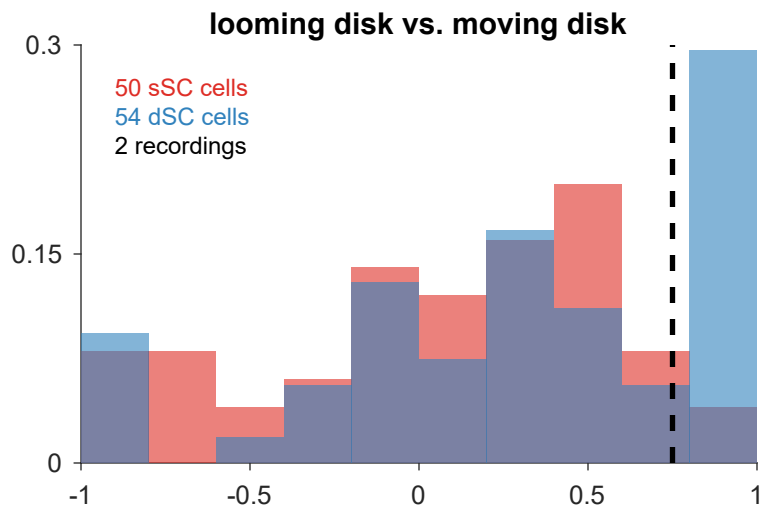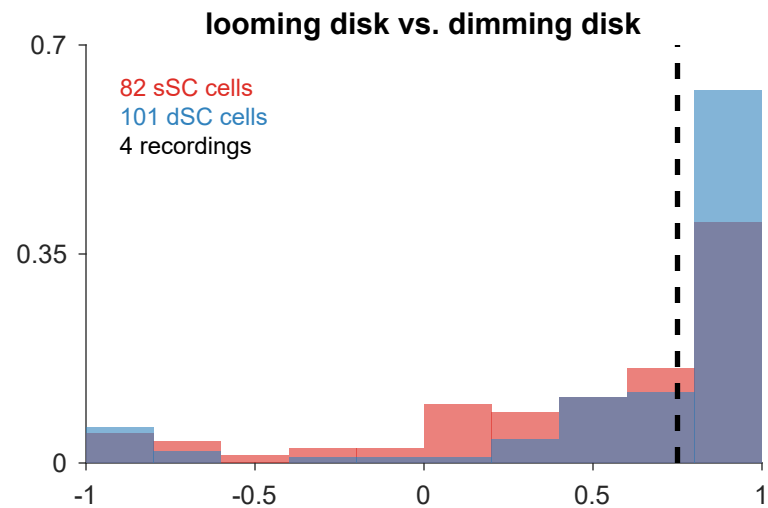

Supplement: supp [file elife-50678-supp-v1.zip]
